# Supplementary material for: Gene expression meta-analysis of Parkinson’s disease and its relationship with Alzheimer’s disease
Source: Mol Brain. 2019 Feb 28;12:16. doi: 10.1186/s13041-019-0436-5 (PMC6396547; doi:10.1186/s13041-019-0436-5)
Supplement: Supplementary file 2 — DEGs identified in this study. A full list of the 1046 DEGs identified in this meta-analysis in an Excel file. (XLSX 120 kb) [file 13041_2019_436_MOESM2_ESM.xlsx]

## Sheet: Additional file 2
Entrez Gene	Symbol	PD Average FC	PD metaZscore	PD effect	PD metaPval	PD Bonf Pval	PD FDR Pval	AD metaZscore	AD metaPval	AD effect	AD meta_Pval	AD Bonf Pval	AD Average FC	AD BraakR	AD atrophyR
7534	YWHAZ	0.518085	-6.25615	-------	3.95e-10	4.09e-06	4.09e-06	-6.38696	1.69e-10	-----?	7.28e-09	3.98e-06	0.76	-0.7378	-0.6182
6622	SNCA	0.574645	-5.9991	-------	1.98e-09	2.06e-05	1.03e-05	-7.18513	6.71e-13	------	9.75e-11	1.58e-08	0.74	-0.6596	-0.551
2632	GBE1	0.434017	-5.87662	-?-----	4.19e-09	4.34e-05	1.08e-05
9201	DCLK1	0.52209	-5.91086	-------	3.4e-09	3.53e-05	1.08e-05	-5.54842	2.88e-08	------	4.56e-07	0.000678296	0.67	-0.6801	-0.5566
10605	PAIP1	0.5288	-5.60871	------?	2.04e-08	0.000211225	4.06e-05
55026	TMEM255A	0.388413	-5.58413	-??---?	2.35e-08	0.000243375	4.06e-05
3251	HPRT1	0.452535	-5.30276	-------	1.14e-07	0.00118193	0.000131325	-5.90239	3.58e-09	------	8.32e-08	8.43e-05	0.69	-0.6601	-0.5603
4976	OPA1	0.590392	-5.32243	------?	1.02e-07	0.00106095	0.000131325	-6.11959	9.38e-10	--?---	2.9e-08	2.21e-05	0.77	-0.5919	-0.5474
10439	OLFM1	0.482772	-5.33282	--?---?	9.67e-08	0.00100199	0.000131325	-5.615	1.97e-08	--?---	3.33e-07	0.000462505	0.79	-0.7128	-0.5813
5532	PPP3CB	0.542493	-5.24708	-------	1.55e-07	0.00160126	0.000141345
6571	SLC18A2	0.309098	-5.23646	-?-?---	1.64e-07	0.00169614	0.000141345
8566	PDXK	0.672287	-5.24123	-------	1.6e-07	0.00165283	0.000141345
4191	MDH2	0.598852	-5.2096	-------	1.89e-07	0.00196099	0.000150845	-6.1914	5.96e-10	------	2e-08	1.4e-05	0.82	-0.69	-0.5367
1123	CHN1	0.540002	-5.16603	-------	2.39e-07	0.00247778	0.000176984
5862	RAB2A	0.62115	-5.09801	-------	3.43e-07	0.0035566	0.000237107
80230	RUFY1	1.27074	5.04024	++?+++?	4.65e-07	0.00481774	0.000301108	6.92998	4.21e-12	++?+++	3.78e-10	9.9e-08	1.13	0.7186	0.618
1006	CDH8	0.469802	-5.00135	-????-?	5.69e-07	0.00589922	0.000347013	-5.05605	4.28e-07	--?---	4.15e-06	0.0100717	0.76	-0.6724	-0.5456
2029	ENSA	0.668987	-4.92735	-------	8.34e-07	0.00863703	0.00045458	-5.22791	1.71e-07	--?--+	1.93e-06	0.00403386	0.74	-0.6105	-0.4825
7334	UBE2N	0.65809	-4.92957	-------	8.24e-07	0.00853934	0.00045458	-7.01708	2.27e-12	------	2.39e-10	5.33e-08	0.76	-0.6435	-0.4802
2258	FGF13	0.409247	-4.88449	-------	1.04e-06	0.0107452	0.000486122	-5.42783	5.7e-08	--?---	7.96e-07	0.00134223	0.72	-0.6951	-0.5668
5218	CDK14	0.666561	-4.86352	--?----	1.15e-06	0.0119488	0.000486122	-4.75026	2.03e-06	------	1.54e-05	0.047802	0.84	-0.6086	-0.5394
10955	SERINC3	0.630583	-4.88638	-------	1.03e-06	0.0106425	0.000486122	-6.3048	2.89e-10	------	1.11e-08	6.79e-06	0.78		-0.4461
23732	FRRS1L	0.542544	-4.86767	--?---?	1.13e-06	0.0117012	0.000486122
51382	ATP6V1D	0.574227	-4.87424	-------	1.09e-06	0.0113181	0.000486122	-6.61579	3.7e-11	------	2.13e-09	8.7e-07	0.77	-0.6431	-0.5327
64077	LHPP	1.43143	4.86017	++?++++	1.17e-06	0.012153	0.000486122
60496	AASDHPPT	0.597268	-4.81154	-------	1.5e-06	0.0155194	0.0005969
23677	SH3BP4	1.34303	4.80017	++?+++-	1.59e-06	0.0164268	0.000608402
65055	REEP1	0.453284	-4.75306	--?---?	2e-06	0.0207611	0.000741469	-5.24839	1.53e-07	------	1.76e-06	0.00361038	0.74	-0.6399	-0.5361
26268	FBXO9	0.654724	-4.74438	------?	2.09e-06	0.021672	0.000747311	-7.26084	3.85e-13	--?---	6.29e-11	9.05e-09	0.73	-0.6957	-0.5115
334	APLP2	0.72243	-4.72259	-------	2.33e-06	0.0241292	0.000804307
377	ARF3	0.699686	-4.68531	-------	2.8e-06	0.0289662	0.000831214	-5.57543	2.47e-08	------	4.01e-07	0.00058099	0.84		-0.556
523	ATP6V1A	0.586828	-4.67757	-------	2.9e-06	0.0300804	0.000831214	-4.95862	7.1e-07	------	6.3e-06	0.0167053	0.71		-0.4477
2782	GNB1	0.67678	-4.67928	-------	2.88e-06	0.0298304	0.000831214
5230	PGK1	0.599363	-4.67123	-------	2.99e-06	0.0310247	0.000831214
8760	CDS2	0.569184	-4.66754	-?--?-?	3.05e-06	0.0315861	0.000831214
9791	PTDSS1	0.688443	-4.67426	-------	2.95e-06	0.0305699	0.000831214
23788	MTCH2	0.519122	-4.69027	-?-??--	2.73e-06	0.0282718	0.000831214
56941	HMCES	0.792719	-4.68993	--?---?	2.73e-06	0.0283187	0.000831214
10409	BASP1	0.558359	-4.65481	-------	3.24e-06	0.0336016	0.00086158	-4.93784	7.9e-07	------	6.89e-06	0.0185866	0.83	-0.5916	-0.5199
23710	GABARAPL1	0.661706	-4.63179	------?	3.63e-06	0.0375634	0.000939086	-5.27336	1.34e-07	--?---	1.58e-06	0.00315175	0.8	-0.6987	-0.5464
9910	RABGAP1L	0.608173	-4.58624	------?	4.51e-06	0.0467648	0.0011406
10949	HNRNPA0	0.703775	-4.56642	------+	4.96e-06	0.0514074	0.00122398
1488	CTBP2	1.28594	4.5543	+++++++	5.26e-06	0.0544617	0.00122675	5.40725	6.4e-08	++?+++	8.72e-07	0.00150592	1.17	0.6549	0.5756
4190	MDH1	0.50209	-4.54683	-------	5.45e-06	0.0564307	0.00122675	-5.80511	6.43e-09	------	1.34e-07	0.000151354	0.7	-0.6526	-0.5438
22987	SV2C	0.326913	-4.54872	-+??--?	5.4e-06	0.0559258	0.00122675
23236	PLCB1	0.648149	-4.56012	------?	5.11e-06	0.0529761	0.00122675	-5.4204	5.95e-08	------	8.24e-07	0.00139926	0.81	-0.6362	-0.5455
6990	DYNLT3	0.590605	-4.53123	-------	5.86e-06	0.0607653	0.00126594	-4.78547	1.71e-06	------	1.33e-05	0.0401391	0.8	-0.5994	-0.4763
64112	MOAP1	0.593405	-4.53378	-------	5.79e-06	0.0600338	0.00126594
819	CAMLG	0.722524	-4.52324	-+-----	6.09e-06	0.0631046	0.00128785
23259	DDHD2	0.627113	-4.51704	------?	6.27e-06	0.0649789	0.00129958	-5.04703	4.49e-07	--?---	4.31e-06	0.0105589	0.84	-0.638	-0.5237
3797	KIF3C	0.654642	-4.51147	--?----	6.44e-06	0.0667107	0.00130805
2983	GUCY1B3	0.603692	-4.49665	--?----	6.9e-06	0.0715331	0.00137393	-5.24387	1.57e-07	--?---	1.8e-06	0.00369993	0.72	-0.6243	-0.4703
5725	PTBP1	1.38505	4.49163	++++++?	7.07e-06	0.073237	0.00137393	7.42756	1.11e-13	++++++	2.5e-11	2.6e-09	1.29	0.701	0.5553
51701	NLK	0.678542	-4.48888	----?--	7.16e-06	0.074192	0.00137393	-5.21461	1.84e-07	--?---	2.05e-06	0.00433431	0.81	-0.6481	-0.5225
4753	NELL2	0.565254	-4.48038	--?----	7.45e-06	0.077208	0.00137871	-4.78519	1.71e-06	------	1.33e-05	0.0401944	0.73		-0.5087
8034	SLC25A16	1.35328	4.48215	++++++?	7.39e-06	0.0765685	0.00137871
79155	TNIP2	1.34211	4.45537	++??++?	8.37e-06	0.0867788	0.00152243	5.6759	1.38e-08	++?+++	2.5e-07	0.000324617	1.23	0.701	0.5324
9522	SCAMP1	0.67918	-4.4481	-------	8.66e-06	0.0897687	0.00154774
491	ATP2B2	0.688033	-4.43474	-------	9.22e-06	0.0955223	0.00161902	-6.29614	3.05e-10	--+---	1.16e-08	7.18e-06	0.82	-0.7191	-0.5751
285231	FBXW12	1.52349	4.42757	++++++?	9.53e-06	0.0987508	0.00164585
3708	ITPR1	0.617271	-4.41775	--?----	9.97e-06	0.103345	0.00167104
5707	PSMD1	0.759301	-4.41721	--?----	1e-05	0.103605	0.00167104
27075	TSPAN13	0.597287	-4.40044	-------	1.08e-05	0.111945	0.0017769
4026	LPP	1.38761	4.39179	+++?++-	1.12e-05	0.116489	0.00182015
400	ARL1	0.710798	-4.38231	-+-----	1.17e-05	0.121681	0.00185816
1523	CUX1	1.37016	4.3616	++??+++	1.29e-05	0.133788	0.00185816
2932	GSK3B	0.615568	-4.37618	---?---	1.21e-05	0.125152	0.00185816
3157	HMGCS1	0.662448	-4.36308	------+	1.28e-05	0.132886	0.00185816	-5.3961	6.81e-08	--?---	9.14e-07	0.00160247	0.78	-0.633	-0.5135
6857	SYT1	0.43862	-4.37925	--?----	1.19e-05	0.123398	0.00185816	-5.49945	3.81e-08	------	5.7e-07	0.000896445	0.66	-0.6377	-0.5114
9500	MAGED1	0.715098	-4.36648	--?----	1.26e-05	0.130834	0.00185816	-5.05244	4.36e-07	--?---	4.21e-06	0.0102639	0.79	-0.6448	-0.5243
10479	SLC9A6	0.597988	-4.36207	-------	1.29e-05	0.133502	0.00185816
10687	PNMA2	0.541492	-4.36816	-------	1.25e-05	0.129831	0.00185816
2872	MKNK2	1.58293	4.35825	++++++-	1.31e-05	0.135853	0.001861	5.89415	3.77e-09	++++++	8.63e-08	8.86e-05	1.55		0.5081
9747	TCAF1	0.529129	-4.35467	----?-?	1.33e-05	0.13809	0.00186609
4781	NFIB	1.1983	4.34999	++-+++-	1.36e-05	0.14107	0.00188093
51560	RAB6B	0.647916	-4.34363	------+	1.4e-05	0.145221	0.0019108
27069	GHITM	0.657949	-4.3386	-------	1.43e-05	0.148585	0.00192968
4674	NAP1L2	0.5549	-4.33237	-------	1.48e-05	0.152854	0.00193486	-4.81715	1.46e-06	------	1.17e-05	0.0342653	0.75	-0.6042	-0.5258
5700	PSMC1	0.707897	-4.3329	-+-----	1.47e-05	0.152483	0.00193486
93664	CADPS2	0.558238	-4.32577	------?	1.52e-05	0.157501	0.00196876
22911	WDR47	0.679645	-4.32081	--?---?	1.55e-05	0.161088	0.00198874
5110	PCMT1	0.623944	-4.31596	-+-----	1.59e-05	0.164662	0.00199568	-5.33081	9.78e-08	------	1.22e-06	0.00230061	0.72	-0.6223	-0.4811
7320	UBE2B	0.687155	-4.31465	-------	1.6e-05	0.165641	0.00199568
9158	FIBP	0.765755	-4.31184	--?----	1.62e-05	0.167766	0.00199721	-5.27359	1.34e-07	--?---	1.58e-06	0.00314781	0.79	-0.6854	-0.6042
7529	YWHAB	0.680364	-4.29656	-------	1.73e-05	0.179745	0.00211465	-4.74463	2.09e-06	------	1.58e-05	0.0491516	0.77	-0.6243	-0.5166
9202	ZMYM4	0.710097	-4.29371	-------	1.76e-05	0.182075	0.00211715	-5.0877	3.62e-07	------	3.6e-06	0.00852792	0.88
1629	DBT	1.41316	4.28478	++++++?	1.83e-05	0.189541	0.00215482
27346	TMEM97	0.74534	-4.28468	--?---?	1.83e-05	0.189624	0.00215482
9581	PREPL	0.657364	-4.27188	------?	1.94e-05	0.200849	0.00215967
10486	CAP2	0.631153	-4.27343	--?----	1.92e-05	0.199455	0.00215967	-4.88344	1.04e-06	--?---	8.78e-06	0.0245298	0.78	-0.6884	-0.5723
22880	MORC2	1.2265	4.28013	++?+++?	1.87e-05	0.193548	0.00215967	4.99075	6.01e-07	+++++-	5.5e-06	0.014152	1.17	0.5898	0.4414
54674	LRRN3	0.675138	-4.27357	------?	1.92e-05	0.199333	0.00215967
90338	ZNF160	1.53787	4.27365	++++++?	1.92e-05	0.199256	0.00215967
2743	GLRB	0.564674	-4.26717	-------	1.98e-05	0.205137	0.00218021
6616	SNAP25	0.429213	-4.26268	-------	2.02e-05	0.2093	0.00218021	-5.69611	1.23e-08	------	2.27e-07	0.000288419	0.62	-0.6371	-0.5573
55670	PEX26	0.827458	-4.26372	--?---?	2.01e-05	0.208329	0.00218021
51230	PHF20	1.22601	4.25718	++?-+++	2.07e-05	0.214515	0.00218892
55841	WWC3	1.19805	4.2577	++?-++?	2.07e-05	0.214021	0.00218892	6.51447	7.29e-11	++++++	3.74e-09	1.72e-06	1.28	0.6692	0.5165
4595	MUTYH	1.15754	4.25447	++?++++	2.1e-05	0.217128	0.00219322
3752	KCND3	0.669249	-4.24418	-+----?	2.19e-05	0.227334	0.00222876
81553	FAM49A	0.682657	-4.24789	--?---?	2.16e-05	0.223603	0.00222876	-5.83733	5.3e-09	--?---	1.15e-07	0.000124814	0.77	-0.653	-0.5356
119504	ANAPC16	2.30387	4.24612	+?+????	2.18e-05	0.225376	0.00222876	6.81908	9.16e-12	++?++-	7.14e-10	2.16e-07	1.38
2321	FLT1	1.41293	4.23269	+++++++	2.31e-05	0.23927	0.00226058
3423	IDS	0.763287	-4.2332	------+	2.3e-05	0.238733	0.00226058	-6.98957	2.76e-12	--?---	2.8e-10	6.49e-08	0.83	-0.717	-0.6179
5007	OSBP	0.726231	-4.23236	-------	2.31e-05	0.239621	0.00226058
9666	DZIP3	0.66964	-4.2374	-?----?	2.26e-05	0.234309	0.00226058	-5.07845	3.81e-07	------	3.75e-06	0.00895391	0.81		-0.4631
7447	VSNL1	0.415726	-4.22584	--?----	2.38e-05	0.246671	0.00228399	-5.09922	3.41e-07	--?---	3.43e-06	0.00802509	0.66	-0.6219	-0.5582
10776	ARPP19	0.6936	-4.22688	------+	2.37e-05	0.245534	0.00228399	-6.58213	4.64e-11	--?---	2.57e-09	1.09e-06	0.68	-0.6931	-0.5326
9568	GABBR2	0.55878	-4.21674	------+	2.48e-05	0.256829	0.00231377	-5.03608	4.75e-07	------	4.52e-06	0.0111808	0.81	-0.6229	-0.5308
25820	ARIH1	0.746635	-4.21847	-------	2.46e-05	0.254875	0.00231377
27020	NPTN	0.607077	-4.21697	-------	2.48e-05	0.25657	0.00231377
287	ANK2	0.612959	-4.21367	-------	2.51e-05	0.260355	0.0023246
2596	GAP43	0.503389	-4.2078	------+	2.58e-05	0.267204	0.00236124	-5.88177	4.06e-09	------	9.18e-08	9.55e-05	0.74	-0.6726	-0.5886
10962	MLLT11	0.519533	-4.20613	------?	2.6e-05	0.269182	0.00236124	-4.81151	1.5e-06	--?---	1.19e-05	0.0352461	0.72	-0.651	-0.5428
5504	PPP1R2	0.615327	-4.20091	-+----?	2.66e-05	0.275469	0.00239538	-5.84437	5.08e-09	------	1.11e-07	0.000119649	0.78		-0.4449
161	AP2A2	0.753259	-4.19883	--?---?	2.68e-05	0.278006	0.0023966
10463	SLC30A9	0.663463	-4.19336	-------	2.75e-05	0.284802	0.00243421
9890	PLPPR4	0.639072	-4.18827	------?	2.81e-05	0.291263	0.00244759	-5.70312	1.18e-08	--?---	2.2e-07	0.000276797	0.79	-0.6601	-0.5516
26959	HBP1	1.2352	4.18866	++?+++-	2.81e-05	0.290759	0.00244759	4.96969	6.71e-07	++?+++	6.01e-06	0.0157796	1.14	0.6934	0.5786
63917	GALNT11	0.736809	-4.1852	--?---?	2.85e-05	0.295225	0.00246021	-4.77259	1.82e-06	--?---	1.41e-05	0.0427944	0.89	-0.6783	-0.5437
7419	VDAC3	0.689523	-4.18173	-+-----	2.89e-05	0.299768	0.00247743
79939	SLC35E1	1.5585	4.17387	+++?++?	2.99e-05	0.310304	0.00252279
440279	UNC13C	0.182001	-4.17433	-?-????	2.99e-05	0.309685	0.00252279	-5.13209	2.87e-07	--?---	2.96e-06	0.00674224	0.82	-0.6418	-0.5135
57415	C3orf14	0.737308	-4.16747	--?---?	3.08e-05	0.319152	0.00257381	-6.07951	1.21e-09	-+----	3.56e-08	2.84e-05	0.76	-0.6326	-0.4959
10381	TUBB3	0.584617	-4.16537	-------	3.11e-05	0.322102	0.00257682	-5.40527	6.47e-08	--?---	8.8e-07	0.00152267	0.76	-0.5949	-0.5646
5935	RBM3	0.490977	-4.15933	--?---?	3.19e-05	0.330731	0.00261468	-5.22422	1.75e-07	+-----	1.97e-06	0.00411513	0.79	-0.5967	-0.4789
55750	AGK	0.774487	-4.15841	--?-?-?	3.2e-05	0.332065	0.00261468
2785	GNG3	0.544104	-4.15193	----?-?	3.3e-05	0.341618	0.00266889	-6.66136	2.71e-11	------	1.67e-09	6.38e-07	0.72	-0.7189	-0.6008
1142	CHRNB3	0.57921	-4.14887	-????-?	3.34e-05	0.34622	0.00268388
3098	HK1	0.758696	-4.13778	--?----	3.51e-05	0.363377	0.00268652
5567	PRKACB	0.62763	-4.14029	------+	3.47e-05	0.359416	0.00268652
6426	SRSF1	1.20812	4.13796	++-++++	3.5e-05	0.363089	0.00268652
9443	MED7	0.718069	-4.14118	-?-+--?	3.46e-05	0.358034	0.00268652	-5.68957	1.27e-08	--?---	2.33e-07	0.000299673	0.88	-0.6127	-0.4658
29114	TAGLN3	0.627428	-4.13653	--?----	3.53e-05	0.365367	0.00268652	-5.23213	1.68e-07	--?---	1.9e-06	0.00394287	0.76	-0.6302	-0.5523
30827	CXXC1	1.14618	4.14508	++?++++	3.4e-05	0.351988	0.00268652
57110	HRASLS	0.740555	-4.14609	-???--?	3.38e-05	0.350442	0.00268652	-6.6585	2.77e-11	------	1.68e-09	6.51e-07	0.82	-0.6883	-0.538
8233	ZRSR2	1.17027	4.12999	++?++++	3.63e-05	0.375906	0.00274384
8867	SYNJ1	0.573131	-4.12216	--?----	3.75e-05	0.388923	0.00281828	-6.85977	6.9e-12	--?---	5.63e-10	1.62e-07	0.76	-0.6372	-0.4916
3845	KRAS	0.691245	-4.119	-------	3.81e-05	0.394303	0.00282564
54332	GDAP1	0.319945	-4.11824	-?-????	3.82e-05	0.39559	0.00282564	-5.18042	2.21e-07	--?---	2.4e-06	0.00520935	0.76	-0.6626	-0.5303
9444	QKI	1.46985	4.11457	++-+++?	3.88e-05	0.401949	0.00283622
27445	PCLO	0.669081	-4.11249	------?	3.91e-05	0.40558	0.00283622	-5.39558	6.83e-08	--?---	9.15e-07	0.00160717	0.72	-0.6381	-0.5766
51606	ATP6V1H	0.630051	-4.11262	--?---?	3.91e-05	0.405347	0.00283622	-4.95874	7.1e-07	--?---	6.3e-06	0.0166953	0.79	-0.6133	-0.5184
10900	RUNDC3A	0.655759	-4.10707	--?----	4.01e-05	0.41522	0.00288347
8837	CFLAR	1.25834	4.10144	++?-++?	4.11e-05	0.425455	0.00293417	6.00077	1.96e-09	++?+++	5.22e-08	4.62e-05	1.23	0.6821	0.5376
3488	IGFBP5	1.64579	4.09947	++?+++?	4.14e-05	0.429081	0.00293891
10231	RCAN2	0.575109	-4.09563	-+-----	4.21e-05	0.436268	0.00296781	-5.74701	9.08e-09	--?---	1.78e-07	0.000213731	0.74	-0.6681	-0.567
4287	ATXN3	0.527069	-4.09284	-?-??-?	4.26e-05	0.441554	0.00298347
3643	INSR	1.28791	4.08817	++-?+++	4.35e-05	0.450534	0.00301415
64421	DCLRE1C	1.42665	4.08735	++++++?	4.36e-05	0.452122	0.00301415	5.50634	3.66e-08	++?++-	5.53e-07	0.00086209	1.2	0.659	0.5721
54928	IMPAD1	0.276895	-4.08437	-?-????	4.42e-05	0.457971	0.00303292	-5.07422	3.89e-07	--?---	3.82e-06	0.00915506	0.8
7162	TPBG	0.621021	-4.08203	--??---	4.46e-05	0.462595	0.00304339
8036	SHOC2	0.677544	-4.08043	-+-----	4.5e-05	0.465792	0.00304439
55859	BEX1	0.593196	-4.07341	------?	4.63e-05	0.480061	0.00311728
10651	MTX2	0.647941	-4.07139	-------	4.67e-05	0.484248	0.00312418	-4.95113	7.38e-07	--?---	6.51e-06	0.0173611	0.77		-0.5096
6252	RTN1	0.56532	-4.06874	-------	4.73e-05	0.489791	0.00313968
2744	GLS	0.54136	-4.06488	------?	4.81e-05	0.497965	0.00317176
2281	FKBP1B	0.663573	-4.06308	--?+---	4.84e-05	0.501832	0.00317615
29887	SNX10	0.496962	-4.06032	----?--	4.9e-05	0.507806	0.00319375	-5.99264	2.06e-09	------	5.46e-08	4.86e-05	0.72	-0.6237	-0.5317
2617	GARS	0.71744	-4.048	-------	5.17e-05	0.53526	0.00319921
3014	H2AFX	1.20506	4.05323	++?-+?+	5.05e-05	0.523429	0.00319921
6585	SLIT1	0.719385	-4.04973	--?---+	5.13e-05	0.531333	0.00319921
9783	RIMS3	0.490748	-4.05018	--?---?	5.12e-05	0.530298	0.00319921
10213	PSMD14	0.659808	-4.05394	-+-----	5.04e-05	0.521847	0.00319921
23463	ICMT	0.803813	-4.05735	-+?----	4.96e-05	0.514287	0.00319921
54499	TMCO1	0.74551	-4.04704	-+----?	5.19e-05	0.537467	0.00319921
55657	ZNF692	1.19733	4.05003	+-?+++?	5.12e-05	0.530659	0.00319921
56255	TMX4	0.58316	-4.05547	-+----?	5e-05	0.518443	0.00319921
10383	TUBB4B	0.638489	-4.0446	-------	5.24e-05	0.543095	0.00321358
7277	TUBA4A	0.57562	-4.03812	------?	5.39e-05	0.558324	0.00328426	-5.01701	5.25e-07	------	4.93e-06	0.0123487	0.76	-0.6086	-0.544
989	2007-09-01	0.728747	-4.0277	-------	5.63e-05	0.583646	0.00333512
4487	MSX1	1.27299	4.03203	++?+++?	5.53e-05	0.572979	0.00333512	5.81565	6.04e-09	++?+++	1.27e-07	0.000142119	1.51	0.6145	0.5376
5048	PAFAH1B1	0.717689	-4.02893	--?----	5.6e-05	0.580604	0.00333512	-5.99647	2.02e-09	------	5.34e-08	4.75e-05	0.78	-0.65	-0.5332
9315	NREP	0.574558	-4.03037	------?	5.57e-05	0.577062	0.00333512	-8.39251	0	------	0	0	0.75
55334	SLC39A9	0.47269	-4.03099	-?-????	5.55e-05	0.575541	0.00333512	-6.24591	4.21e-10	--?---	1.51e-08	9.91e-06	0.86	-0.5983
5451	POU2F1	1.1926	4.02498	+???+++	5.7e-05	0.590429	0.00335471
26471	NUPR1	1.55579	4.01946	++++++-	5.83e-05	0.604446	0.00341495	8.18989	2.22e-16	++++++	2.01e-13	5.22e-12	1.66	0.7051	0.563
27067	STAU2	0.673369	-4.01712	---?---	5.89e-05	0.610468	0.00342959	-5.51784	3.43e-08	------	5.25e-07	0.000807521	0.79	-0.6035	-0.5128
9908	G3BP2	0.605363	-4.01569	-------	5.93e-05	0.614173	0.00343114	-4.89102	1e-06	--?---	8.51e-06	0.023604	0.75	-0.6408	-0.5014
22930	RAB3GAP1	0.724052	-4.01413	-+----?	5.97e-05	0.618258	0.00343477
5144	PDE4D	0.704013	-4.01148	----?-?	6.03e-05	0.625237	0.00343831
23168	RTF1	0.729398	-4.01128	------?	6.04e-05	0.625773	0.00343831	-6.06541	1.32e-09	--?---	3.82e-08	3.1e-05	0.79	-0.6232	-0.5432
5515	PPP2CA	0.709899	-4.00854	-------	6.11e-05	0.633057	0.00345933
518	ATP5G3	0.660566	-4.00613	-+-----	6.17e-05	0.639554	0.00347584	-5.54001	3.02e-08	--?---	4.72e-07	0.000711686	0.81	-0.6539	-0.5179
7728	ZNF175	1.27987	4.00144	+????+?	6.3e-05	0.652376	0.00352636
25977	NECAP1	0.620444	-3.99289	--?---?	6.53e-05	0.676357	0.00363633	-6.30806	2.83e-10	------	1.1e-08	6.65e-06	0.71	-0.6622	-0.5414
5970	RELA	1.1747	3.99024	++?-+++	6.6e-05	0.683954	0.00365405	6.20547	5.45e-10	++?+++	1.85e-08	1.28e-05	1.26	0.7054	0.5667
55885	LMO3	0.747742	-3.9892	--?+---	6.63e-05	0.686961	0.00365405
10106	CTDSP2	1.24504	3.98277	+++++++	6.81e-05	0.705835	0.00373458	5.2281	1.71e-07	++?+++	1.93e-06	0.0040298	1.27	0.7019	0.5839
398	ARHGDIG	0.557207	-3.97822	--?-???	6.94e-05	0.719476	0.00376854
23531	MMD	0.720256	-3.97811	---+---	6.95e-05	0.719791	0.00376854
9737	GPRASP1	0.636881	-3.97254	--?---?	7.11e-05	0.736858	0.0038187	-6.60028	4.1e-11	--?---	2.33e-09	9.66e-07	0.66	-0.6725	-0.564
11334	TUSC2	0.872105	-3.97249	--?---+	7.11e-05	0.737009	0.0038187	-6.77704	1.23e-11	------	9.08e-10	2.89e-07	0.85	-0.7252	-0.5773
27122	DKK3	0.66531	-3.95776	-+-----	7.57e-05	0.78395	0.00404098
29902	FAM216A	0.697903	-3.95619	--?---?	7.62e-05	0.789112	0.00404673	-5.05967	4.2e-07	------	4.08e-06	0.0098824	0.78
7280	TUBB2A	0.623316	-3.95477	------?	7.66e-05	0.793815	0.00405008
5063	PAK3	0.590313	-3.95314	------+	7.71e-05	0.799233	0.00405702	-5.50624	3.67e-08	------	5.53e-07	0.000862581	0.8	-0.6292	-0.5194
4591	TRIM37	0.579138	-3.95076	------?	7.79e-05	0.807233	0.00407694
58526	MID1IP1	1.30579	3.94839	++-+++?	7.87e-05	0.81527	0.00409683	7.09934	1.25e-12	++++++	1.49e-10	2.95e-08	1.42	0.6119	0.4737
65018	PINK1	0.793549	-3.94267	------?	8.06e-05	0.834976	0.00415411
79947	DHDDS	0.78152	-3.94343	-???--?	8.03e-05	0.832312	0.00415411	-6.3386	2.32e-10	--?---	9.33e-09	5.46e-06	0.89	-0.6409	-0.5604
5205	ATP8B1	1.66985	3.93591	+++?+++	8.29e-05	0.858814	0.00425155
9679	FAM53B	1.1299	3.92901	+-?-++?	8.53e-05	0.883835	0.00435387
170960	ZNF721	1.56461	3.92633	+++?++?	8.63e-05	0.893747	0.00438111
54842	MFSD6	0.36423	-3.91445	-?-????	9.06e-05	0.938892	0.00457996	-4.74273	2.11e-06	--?---	1.59e-05	0.0496144	0.78	-0.5927	-0.4632
6715	SRD5A1	0.65719	-3.91235	-???--?	9.14e-05	0.947129	0.00459772	-6.22278	4.88e-10	--?---	1.69e-08	1.15e-05	0.75	-0.6909	-0.596
79133	NDUFAF5	0.391115	-3.91042	-?-????	9.21e-05	0.954693	0.00461204	-5.83596	5.35e-09	--?---	1.15e-07	0.000125845	0.77
8678	BECN1	0.822766	-3.90698	--?----	9.35e-05	0.968399	0.00465576	-5.96935	2.38e-09	------	6.16e-08	5.6e-05	0.84	-0.6363	-0.4545
54902	TTC19	0.673443	-3.90532	------?	9.41e-05	0.975078	0.00466545
5478	PPIA	0.707629	-3.897	-----+-	9.74e-05	1	0.00480549
23335	WDR7	0.706379	-3.89394	--?---?	9.86e-05	1	0.00482081
259217	HSPA12A	0.577073	-3.89474	------?	9.83e-05	1	0.00482081
4628	MYH10	0.711991	-3.88955	--?---?	0.000100428	1	0.00488562
8106	PABPN1	1.2102	3.88779	++?++++	0.000101159	1	0.00489819
9867	PJA2	0.694581	-3.88127	--?---?	0.00010391	1	0.00498481	-5.09016	3.58e-07	--?---	3.56e-06	0.00841806	0.84	-0.6127	-0.5047
56675	NRIP3	0.654036	-3.88142	---?--?	0.000103848	1	0.00498481	-5.89967	3.64e-09	--?---	8.41e-08	8.57e-05	0.76	-0.6721	-0.5655
285527	FRYL	1.28264	3.8784	++-+++?	0.000105147	1	0.00502088
5599	MAPK8	0.471747	-3.87688	-?-????	0.000105802	1	0.00502902	-5.11101	3.2e-07	--+---	3.24e-06	0.00754009	0.83	-0.6114	-0.4857
4094	MAF	1.33034	3.87501	+++?+++	0.000106619	1	0.00504467	5.20778	1.91e-07	++?+++	2.11e-06	0.00449686	1.2
3156	HMGCR	0.694313	-3.87273	--?---?	0.000107624	1	0.00504615	-5.00609	5.55e-07	------	5.17e-06	0.01307	0.77		-0.4628
55521	TRIM36	0.637759	-3.8728	-??---?	0.000107593	1	0.00504615	-5.61371	1.98e-08	--?---	3.35e-07	0.000465974	0.75	-0.6252	-0.5441
23210	JMJD6	1.60976	3.87005	+???++?	0.000108812	1	0.00507886
506	ATP5B	0.74496	-3.86355	--?----	0.000111753	1	0.00519273
216	ALDH1A1	0.542603	-3.86127	-+-----	0.000112799	1	0.00520889	-6.72027	1.81e-11	------	1.21e-09	4.27e-07	0.78
9167	COX7A2L	0.752053	-3.86061	-+-----	0.000113106	1	0.00520889	-5.4452	5.17e-08	--?--+	7.36e-07	0.00121759	0.86		-0.4585
9334	B4GALT5	0.773635	-3.85564	--?----	0.000115426	1	0.00529223
1113	CHGA	0.594394	-3.85305	----?-+	0.000116656	1	0.00532505
5527	PPP2R5C	0.711354	-3.84489	-------	0.000120605	1	0.00548118	-5.56943	2.56e-08	--?---	4.12e-07	0.000601372	0.87	-0.672	-0.53
378938	MALAT1	2.08318	3.84272	+?+????	0.000121678	1	0.0055058
9892	SNAP91	0.436685	-3.84157	----?-?	0.000122251	1	0.00550766
528	ATP6V1C1	0.668625	-3.83756	-------	0.000124263	1	0.00555005
9590	AKAP12	0.596287	-3.83856	-------	0.00012376	1	0.00555005
9145	SYNGR1	0.675193	-3.836	------+	0.000125057	1	0.00556153
119	ADD2	0.606448	-3.82238	------?	0.00013217	1	0.00585276	-5.47438	4.39e-08	--?---	6.39e-07	0.00103308	0.78	-0.6787	-0.5548
9070	ASH2L	0.869108	-3.81272	--?----	0.000137444	1	0.00605403	-6.3777	1.8e-10	--?---	7.62e-09	4.23e-06	0.83	-0.6267	-0.5152
26059	ERC2	0.495568	-3.81193	---??-?	0.000137884	1	0.00605403
800	CALD1	1.2197	3.80903	++-+++?	0.000139512	1	0.00609966	5.38694	7.17e-08	++++++	9.54e-07	0.00168636	1.33	0.6674	0.5572
8985	PLOD3	1.22064	3.80366	++?-+++	0.000142573	1	0.00615666
23102	TBC1D2B	1.17954	3.80362	++?+++?	0.000142598	1	0.00615666	7.89642	2.89e-15	++++++	1.66e-12	6.79e-11	1.2	0.738	0.5813
55701	ARHGEF40	1.52955	3.80411	+++?++?	0.000142312	1	0.00615666	5.52412	3.31e-08	++?++-	5.1e-07	0.000779183	1.42
3422	IDI1	0.819756	-3.80179	--?----	0.000143656	1	0.0061766	-4.91832	8.73e-07	------	7.54e-06	0.0205389	0.87
23543	RBFOX2	0.738132	-3.79982	--?----	0.000144801	1	0.00620013	-5.90112	3.61e-09	--?---	8.38e-08	8.5e-05	0.84
55860	ACTR10	0.616439	-3.79566	-+----?	0.000147254	1	0.0062792	-5.15493	2.54e-07	--?---	2.67e-06	0.00597002	0.79	-0.6521	-0.4909
80279	CDK5RAP3	1.24681	3.79343	++?++++	0.000148578	1	0.0063097
4719	NDUFS1	0.693792	-3.79196	-+-----	0.000149464	1	0.00632143
53407	STX18	0.845584	-3.79043	-??----	0.000150389	1	0.00633466	-5.10142	3.37e-07	--?--+	3.39e-06	0.00793238	0.91
23229	ARHGEF9	0.621059	-3.78851	--?-???	0.000151554	1	0.0063579	-6.61721	3.66e-11	------	2.12e-09	8.61e-07	0.76	-0.6324	-0.5665
4144	MAT2A	1.23305	3.78599	++-++++	0.000153098	1	0.00639069
54839	LRRC49	0.682679	-3.78523	-+?---?	0.000153569	1	0.00639069	-5.26361	1.41e-07	--?---	1.65e-06	0.00332373	0.79	-0.6221	-0.5052
4830	NME1	0.723407	-3.77787	--?----	0.000158174	1	0.00655601	-6.41783	1.38e-10	------	6.18e-09	3.25e-06	0.7	-0.6796	-0.5841
5087	PBX1	0.630417	-3.77687	------?	0.000158813	1	0.00655624	-4.82585	1.39e-06	-+?---	1.12e-05	0.0328022	0.9	-0.616	-0.5019
902	CCNH	0.747555	-3.77324	-+-----	0.000161141	1	0.00657378
2892	GRIA3	0.496176	-3.77391	-?-????	0.000160707	1	0.00657378
23158	TBC1D9	0.558345	-3.77415	--?---?	0.000160555	1	0.00657378	-5.29873	1.17e-07	--?---	1.41e-06	0.0027438	0.76	-0.6698	-0.5343
23040	MYT1L	0.526991	-3.77151	--?---?	0.00016226	1	0.00658034
114884	OSBPL10	0.650625	-3.77104	-+??--?	0.000162572	1	0.00658034
23171	GPD1L	0.682607	-3.76883	------?	0.000164018	1	0.00658741
55596	ZCCHC8	1.24661	3.76891	++?+++?	0.000163963	1	0.00658741	6.09999	1.06e-09	++?+++	3.19e-08	2.5e-05	1.21	0.7373	0.5935
1114	CHGB	0.483062	-3.76518	--?---?	0.000166429	1	0.00665844	-6.50926	7.55e-11	------	3.83e-09	1.78e-06	0.6	-0.6565	-0.562
7385	UQCRC2	0.645834	-3.75761	-+-----	0.000171545	1	0.00683673	-5.63791	1.72e-08	--?--+	3e-07	0.000405003	0.82	-0.6528	-0.5342
5351	PLOD1	1.19362	3.75227	++?-+?+	0.00017524	1	0.00690356	5.42013	5.96e-08	++++++	8.24e-07	0.00140133	1.17	0.6356	0.4947
5979	RET	0.37107	-3.75135	????--?	0.000175887	1	0.00690356
10097	ACTR2	0.638732	-3.75267	-------	0.000174962	1	0.00690356
23329	TBC1D30	0.610084	-3.75323	-???--?	0.000174571	1	0.00690356	-4.80824	1.52e-06	--?---	1.21e-05	0.0358288	0.74		-0.5348
51646	YPEL5	0.643736	-3.75028	------?	0.000176635	1	0.00690674
9736	USP34	1.36198	3.74856	+++-++?	0.000177854	1	0.00692827
54980	C2orf42	1.19903	3.74334	++?+++?	0.000181588	1	0.00704726
4747	NEFL	0.462109	-3.74076	--?----	0.000183461	1	0.00709337
6000	RGS7	0.650998	-3.73871	--?----	0.000184965	1	0.00712493	-5.85934	4.65e-09	--?---	1.03e-07	0.000109346	0.77	-0.6816	-0.5759
5577	PRKAR2B	0.751419	-3.73699	--+----	0.000186236	1	0.00714734
55364	IMPACT	0.708212	-3.73487	-????-?	0.000187816	1	0.00718136
1780	DYNC1I1	0.620184	-3.73304	-+-----	0.000189182	1	0.00718649
5521	PPP2R2B	0.736957	-3.73283	-+-----	0.000189337	1	0.00718649	-7.85753	4e-15	------	2.04e-12	9.4e-11	0.82	-0.697	-0.5838
5203	PFDN4	0.841325	-3.72982	-+?----	0.000191615	1	0.00719547
5999	RGS4	0.425998	-3.72795	--???-+	0.000193046	1	0.00719547	-7.52015	5.46e-14	------	1.46e-11	1.29e-09	0.6	-0.7244	-0.5765
9183	ZW10	0.863912	-3.72829	-??+?-?	0.000192783	1	0.00719547
10681	GNB5	0.684727	-3.72903	--?---?	0.000192217	1	0.00719547	-5.69531	1.23e-08	--?---	2.28e-07	0.000289774	0.76	-0.6634	-0.5218
26519	TIMM10	0.785616	-3.72914	-????--	0.000192134	1	0.00719547	-4.8603	1.17e-06	--?---	9.68e-06	0.0275791	0.85	-0.6557	-0.5346
9378	NRXN1	0.491124	-3.726	-?-?-??	0.000194546	1	0.00722539	-6.05415	1.41e-09	------	4.06e-08	3.32e-05	0.77	-0.6099	-0.5147
6447	SCG5	0.596266	-3.72151	-------	0.000198036	1	0.00732875	-5.18157	2.2e-07	------	2.38e-06	0.00517716	0.73	-0.6353	-0.5544
91	ACVR1B	0.79423	-3.72004	--?---?	0.000199189	1	0.00733146
7716	VEZF1	1.23872	3.71584	++++++-	0.000202529	1	0.00733146
25813	SAMM50	0.779456	-3.71736	-+?---?	0.000201319	1	0.00733146	-5.67442	1.39e-08	------	2.51e-07	0.000327436	0.84
55322	C5orf22	0.769945	-3.7175	--?---?	0.000201204	1	0.00733146	-5.33572	9.52e-08	--?---	1.2e-06	0.00223926	0.8	-0.6201	-0.513
57466	SCAF4	1.51183	3.71758	+???++?	0.000201142	1	0.00733146
64432	MRPS25	0.523636	-3.71518	-?-????	0.000203062	1	0.00733146	-5.52461	3.3e-08	--?---	5.09e-07	0.00077701	0.78	-0.7087	-0.5943
91548	LOC91548	1.93083	3.71599	+?+????	0.000202413	1	0.00733146
550	AUP1	1.16891	3.71157	++?-+?-	0.000205977	1	0.00741089	5.25405	1.49e-07	++?+++	1.72e-06	0.00350095	1.18	0.6247	0.5395
11332	ACOT7	0.567189	-3.70948	--?----	0.000207688	1	0.00744658
1462	VCAN	1.24551	3.70433	++-++++	0.000211947	1	0.0074958
3419	IDH3A	0.700837	-3.70346	------?	0.000212677	1	0.0074958
22895	RPH3A	0.56633	-3.70594	--?---?	0.000210612	1	0.0074958	-6.02676	1.67e-09	--?---	4.6e-08	3.94e-05	0.71	-0.6883	-0.5998
26137	ZBTB20	1.38075	3.70366	++-++-?	0.000212513	1	0.0074958
349152	DPY19L2P2	0.640706	-3.70405	---?--?	0.000212186	1	0.0074958
10300	KATNB1	0.822736	-3.70075	--?--+-	0.000214959	1	0.00752399
54940	OCIAD1	0.328802	-3.70019	-?-????	0.000215434	1	0.00752399	-5.69624	1.22e-08	------	2.27e-07	0.000288197	0.83	-0.6568	-0.5483
79751	SLC25A22	0.611251	-3.69993	--?????	0.000215656	1	0.00752399
577	ADGRB3	0.718003	-3.68774	--?----	0.000226257	1	0.00765377
3134	HLA-F	1.22931	3.69408	++?++++	0.000220687	1	0.00765377
4296	MAP3K11	1.23282	3.69201	++?++?+	0.000222487	1	0.00765377
5213	PFKM	0.729023	-3.69241	--?----	0.000222143	1	0.00765377	-4.95962	7.06e-07	------	6.28e-06	0.0166196	0.87	-0.6379	-0.5108
5692	PSMB4	0.702256	-3.68311	-+-----	0.000230407	1	0.00765377
6733	SRPK2	0.688655	-3.6854	-+-----	0.000228346	1	0.00765377
7145	TNS1	1.20588	3.68422	++-++++	0.000229405	1	0.00765377	6.5064	7.7e-11	++?+++	3.88e-09	1.81e-06	1.37	0.6609	0.5602
10059	DNM1L	0.707795	-3.69043	-------	0.000223878	1	0.00765377	-5.69609	1.23e-08	------	2.27e-07	0.000288447	0.82	-0.6309	-0.4902
10180	RBM6	1.23508	3.68455	+++++++	0.000229108	1	0.00765377	6.84659	7.56e-12	++++++	6.05e-10	1.78e-07	1.3	0.6167	0.5274
10923	SUB1	0.666231	-3.68306	-+-----	0.000230455	1	0.00765377	-7.04512	1.85e-12	------	2.05e-10	4.36e-08	0.76	-0.7003	-0.5385
11322	TMC6	1.19569	3.68712	++?-+++	0.000226805	1	0.00765377
29803	REPIN1	1.13224	3.68895	++?-+++	0.000225185	1	0.00765377
55312	RFK	0.76086	-3.68793	-+?---?	0.000226089	1	0.00765377
55819	RNF130	1.27242	3.68837	++?-+++	0.000225696	1	0.00765377	5.76256	8.28e-09	++++++	1.64e-07	0.000194942	1.22	0.5962	0.5014
81849	ST6GALNAC5	0.625397	-3.68655	?-??--?	0.000227312	1	0.00765377	-5.90907	3.44e-09	--?---	8.11e-08	8.1e-05	0.66	-0.6167	-0.5276
1153	CIRBP	0.681158	-3.67993	-+-+---	0.000233295	1	0.00772333	-7.33825	2.16e-13	-----+	3.95e-11	5.09e-09	0.69	-0.6174	-0.5369
10752	CHL1	0.662989	-3.67396	-------	0.000238821	1	0.00788109	-4.9385	7.87e-07	--?---	6.87e-06	0.0185243	0.79		-0.5105
7345	UCHL1	0.552034	-3.66901	-------	0.000243488	1	0.0080096	-5.0828	3.72e-07	------	3.68e-06	0.00875105	0.72	-0.6167	-0.5102
2937	GSS	0.859479	-3.66188	--?----	0.000250368	1	0.00820985	-7.13008	1e-12	-----+	1.28e-10	2.36e-08	0.83	-0.6552	-0.5708
5228	PGF	1.48249	3.66037	+++?++?	0.000251851	1	0.00823244
11075	STMN2	0.424996	-3.65747	--?----	0.000254718	1	0.00829997
10492	SYNCRIP	0.735585	-3.65476	-+-----	0.000257419	1	0.00833555
25814	ATXN10	0.695028	-3.6552	-+-----	0.000256986	1	0.00833555	-5.85893	4.66e-09	--?---	1.03e-07	0.000109619	0.79	-0.6643	-0.5063
5602	MAPK10	0.768077	-3.65137	--?----	0.000260848	1	0.00842029	-5.90652	3.49e-09	--?---	8.18e-08	8.22e-05	0.81	-0.6553	-0.5073
5100	PCDH8	0.461262	-3.64832	--+??-?	0.000263966	1	0.00844515	-5.72674	1.02e-08	--?---	1.97e-07	0.000240903	0.68	-0.6472	-0.548
10440	TIMM17A	0.755465	-3.6476	-+?----	0.000264701	1	0.00844515	-5.92623	3.1e-09	--?---	7.49e-08	7.29e-05	0.81	-0.6022	-0.4775
23023	TMCC1	1.2736	3.64857	++?++-?	0.000263709	1	0.00844515
59353	TMEM35A	0.574002	-3.64743	--?---?	0.000264879	1	0.00844515
10048	RANBP9	0.655225	-3.64517	-+-----	0.000267215	1	0.00849351
7994	KAT6A	1.07361	3.64059	++-?++-	0.000272016	1	0.00859338
51593	SRRT	1.14258	3.64063	++-++++	0.000271968	1	0.00859338
25924	MYRIP	0.678732	-3.63926	-???--?	0.000273421	1	0.0086115
85476	GFM1	0.407454	-3.63725	-?-????	0.000275564	1	0.00865271	-5.7054	1.16e-08	------	2.18e-07	0.000273115	0.83		-0.4483
6505	SLC1A1	0.715307	-3.63623	--?----	0.000276656	1	0.00866076
2260	FGFR1	1.38879	3.63481	+++?+++	0.000278191	1	0.00868257
10146	G3BP1	1.3424	3.63392	++++++-	0.000279142	1	0.0086861
9792	SERTAD2	1.24228	3.63007	++?+++?	0.00028334	1	0.00879031
534	ATP6V1G2	0.630508	-3.6272	--?---?	0.000286513	1	0.00881075	-5.34892	8.85e-08	------	1.13e-06	0.00208196	0.69	-0.664	-0.5734
7070	THY1	0.66257	-3.62864	------+	0.000284914	1	0.00881075
25957	PNISR	1.11638	3.62717	++-+++?	0.000286549	1	0.00881075
11177	BAZ1A	1.50666	3.62359	+????+?	0.000290537	1	0.00890694	7.88012	3.33e-15	++++++	1.82e-12	7.84e-11	1.33	0.6974	0.5429
26289	AK5	0.660399	-3.61766	------+	0.000297276	1	0.00908664
10038	PARP2	0.840433	-3.61656	--?----	0.000298543	1	0.00909855	-5.95859	2.54e-09	------	6.47e-08	5.99e-05	0.79		-0.4867
23189	KANK1	1.24915	3.61438	++-+++?	0.000301071	1	0.00914868	4.86728	1.13e-06	++?+++	9.4e-06	0.026623	1.24	0.6223	0.4981
8674	VAMP4	0.718229	-3.61235	-+----?	0.000303429	1	0.00918818
64130	LIN7B	0.739391	-3.61127	-????-?	0.000304701	1	0.00918818	-5.46071	4.74e-08	--?---	6.82e-07	0.0011159	0.83	-0.6485	-0.5547
90624	LYRM7	0.477295	-3.61099	-?-????	0.000305031	1	0.00918818	-5.34274	9.16e-08	-+?---	1.16e-06	0.00215419	0.87		-0.4806
5440	POLR2K	0.747569	-3.60655	-+-----	0.000310293	1	0.00931356
6468	FBXW4	1.19822	3.6053	++?-+++	0.000311795	1	0.00931356
64784	CRTC3	1.19394	3.60522	++?-++?	0.00031189	1	0.00931356
6874	TAF4	1.23241	3.6004	++??++?	0.000317724	1	0.00946051
23313	KIAA0930	1.19813	3.5969	++-+++?	0.000322032	1	0.00956129	4.88156	1.05e-06	++?+++	8.84e-06	0.0247653	1.21
4983	OPHN1	1.23867	3.59357	+++++++	0.000326174	1	0.00965662
2560	GABRB1	0.745485	-3.59183	---?--+	0.000328359	1	0.00969359
4168	MCF2	0.521756	-3.58977	-?-??-?	0.000330972	1	0.00973147
5864	RAB3A	0.698882	-3.58934	--?-??+	0.00033152	1	0.00973147
11258	DCTN3	0.817503	-3.5876	--?----	0.000333736	1	0.00976886
2597	GAPDH	0.78294	-3.58521	-------	0.000336813	1	0.00977606
10159	ATP6AP2	0.627331	-3.58522	-------	0.000336794	1	0.00977606	-5.34729	8.93e-08	------	1.14e-06	0.00210073	0.79	-0.6407	-0.4765
22882	ZHX2	1.24034	3.58541	++?++-?	0.000336555	1	0.00977606
8799	PEX11B	0.676093	-3.58217	-------	0.000340747	1	0.00986264	-5.33789	9.4e-08	??----	1.19e-06	0.00221259	0.84	-0.6406	-0.5235
4038	LRP4	1.36168	3.58046	++++++?	0.000342994	1	0.00990002	5.0385	4.69e-07	++?+++	4.48e-06	0.0110403	1.45	0.6573	0.5477
9764	KIAA0513	0.654	-3.57754	--?---?	0.000346845	1	0.00998336
1763	DNA2	1.33969	3.57501	+????+?	0.000350213	1	0.0100309
5764	PTN	0.733789	-3.57485	---+--?	0.000350434	1	0.0100309
1031	CDKN2C	1.51172	3.57373	+???++?	0.000351931	1	0.010046	5.36858	7.94e-08	++?++-	1.04e-06	0.00186733	1.19	0.634	0.5194
100131096	TNRC6C-AS1	2.07663	3.57243	+?+????	0.000353688	1	0.0100684
6414	SELENOP	1.27012	3.57032	++-++++	0.000356549	1	0.0101221	5.15306	2.56e-07	++?+++	2.7e-06	0.00603007	1.43		0.5109
51747	LUC7L3	1.17823	3.56497	++-++++	0.000363895	1	0.0102743
57446	NDRG3	0.676899	-3.56523	------?	0.000363533	1	0.0102743
8634	RTCA	0.664384	-3.56392	-+-----	0.000365361	1	0.0102877	-4.75894	1.95e-06	--?---	1.49e-05	0.0457924	0.83
403	ARL3	0.734149	-3.56133	-+-----	0.000368978	1	0.0103614
1209	CLPTM1	0.751292	-3.55995	--?-???	0.000370931	1	0.0103681
9917	FAM20B	0.807316	-3.55974	--?-?-?	0.000371218	1	0.0103681
291	SLC25A4	0.692258	-3.55862	-??-?--	0.000372802	1	0.0103843	-5.04891	4.44e-07	--?---	4.27e-06	0.0104555	0.77	-0.6371	-0.5107
7163	TPD52	0.648428	-3.55679	-------	0.000375407	1	0.010401	-4.74292	2.11e-06	-+?---	1.59e-05	0.0495671	0.78		-0.463
28232	SLCO3A1	1.20499	3.55703	++--+++	0.000375066	1	0.010401
1653	DDX1	0.670949	-3.55425	-+-----	0.000379057	1	0.0104527
8869	ST3GAL5	0.725866	-3.55409	-----+-	0.00037929	1	0.0104527
1738	DLD	0.753867	-3.55003	-+?----	0.000385188	1	0.0105441
4675	NAP1L3	0.58304	-3.55017	-------	0.000384983	1	0.0105441	-4.8609	1.17e-06	------	9.66e-06	0.0274958	0.79		-0.4843
50810	HDGFRP3	0.73071	-3.54971	-----+-	0.000385659	1	0.0105441	-5.17309	2.3e-07	-+----	2.46e-06	0.00541784	0.84	-0.6239	-0.4678
4905	NSF	0.556571	-3.54863	--?-?--	0.000387248	1	0.0105579
80349	WDR61	0.7715	-3.54798	-+?----	0.000388205	1	0.0105579	-5.51472	3.49e-08	------	5.32e-07	0.000821983	0.82	-0.6009	-0.4709
65267	WNK3	0.392794	-3.54627	-?-????	0.000390722	1	0.0105986
10678	B3GNT2	0.443738	-3.54157	-?-????	0.000397752	1	0.0107611
900	CCNG1	1.20479	3.53821	++?-?++	0.000402847	1	0.0107905
1008	CDH10	0.776783	-3.53788	--?----	0.000403349	1	0.0107905	-4.85431	1.21e-06	------	9.96e-06	0.0284259	0.84		-0.4927
4281	MID1	1.2788	3.53811	++?+++-	0.000403007	1	0.0107905	4.75504	1.98e-06	++?++-	1.51e-05	0.0466843	1.23		0.503
50618	ITSN2	1.09647	3.53754	++-++++	0.000403873	1	0.0107905	6.31043	2.78e-10	++?+++	1.09e-08	6.55e-06	1.16	0.6834	0.5779
162427	RETREG3	0.835779	-3.53743	--?---?	0.000404045	1	0.0107905
79135	APOO	0.759849	-3.5343	--?---?	0.000408854	1	0.0108908	-5.17384	2.29e-07	------	2.46e-06	0.00539616	0.8	-0.6164	-0.5316
23007	PLCH1	0.790627	-3.53325	--?---?	0.000410489	1	0.0109064
7336	UBE2V2	0.695826	-3.52853	-+-----	0.000417878	1	0.0109821	-5.84018	5.21e-09	------	1.13e-07	0.000122694	0.7	-0.6449	-0.5138
7372	UMPS	0.843684	-3.53026	-???---	0.000415159	1	0.0109821
10302	SNAPC5	0.819315	-3.52826	-+?----	0.000418303	1	0.0109821	-5.89412	3.77e-09	--?---	8.63e-08	8.86e-05	0.78	-0.6617	-0.5009
10475	TRIM38	1.90162	3.52805	+?+????	0.000418638	1	0.0109821	6.59501	4.25e-11	++?+++	2.39e-09	1e-06	1.19	0.5931	0.4873
81929	SEH1L	0.69202	-3.52826	------?	0.000418297	1	0.0109821
81790	RNF170	0.598237	-3.52681	-?-??-?	0.0004206	1	0.0110057
211	ALAS1	0.757409	-3.52437	--?----	0.000424497	1	0.0110797
55800	SCN3B	0.368137	-3.52078	-?-????	0.000430273	1	0.0112022	-7.27151	3.55e-13	--?---	5.89e-11	8.36e-09	0.7	-0.7145	-0.5707
51347	TAOK3	1.20823	3.51846	++?++++	0.000434052	1	0.0112723
10351	ABCA8	1.50491	3.51666	++?+++-	0.000437007	1	0.0113207
604	BCL6	1.23042	3.51455	++++++-	0.000440505	1	0.0113545	7.82817	4.88e-15	++++++	2.3e-12	1.15e-10	1.44	0.714	0.5553
5799	PTPRN2	0.662527	-3.51496	--???-?	0.000439815	1	0.0113545	-5.52103	3.37e-08	--?---	5.17e-07	0.000792994	0.8	-0.6573	-0.5569
9821	RB1CC1	0.684512	-3.51278	------?	0.000443439	1	0.0113928
79789	CLMN	1.38906	3.51233	++?+++?	0.00044419	1	0.0113928	5.34569	9.01e-08	++++++	1.15e-06	0.00211948	1.23	0.5897	0.4693
10286	BCAS2	0.717119	-3.50907	-+-----	0.000449683	1	0.0115052	-5.4339	5.51e-08	--?---	7.73e-07	0.0012973	0.79	-0.6366	-0.5058
9097	USP14	0.754181	-3.50745	-+-----	0.000452418	1	0.0115467
285282	RABL3	0.537027	-3.50598	-?-????	0.000454937	1	0.0115824	-7.181	6.92e-13	--?---	9.99e-11	1.63e-08	0.87		-0.4484
11034	DSTN	0.670315	-3.50259	-+-----	0.000460762	1	0.011702
2915	GRM5	0.745597	-3.50069	--?---?	0.00046405	1	0.0117567
5631	PRPS1	0.732945	-3.49829	-+?---?	0.000468249	1	0.0118341	-6.15951	7.3e-10	------	2.37e-08	1.72e-05	0.83	-0.6592	-0.5306
163782	KANK4	0.507093	-3.49653	-?-????	0.000471358	1	0.0118837
4729	NDUFV2	0.676885	-3.49545	-+-----	0.000473271	1	0.011903
55186	SLC25A36	0.762699	-3.49273	------?	0.000478109	1	0.0119956
80198	MUS81	1.1157	3.48872	++?+++?	0.000485333	1	0.0121474
10989	IMMT	0.754279	-3.48589	-+?----	0.000490506	1	0.0122473	-5.71033	1.13e-08	--?---	2.13e-07	0.000265314	0.81	-0.6359	-0.5121
4741	NEFM	0.502831	-3.48441	-------	0.000493216	1	0.0122853	-4.92789	8.31e-07	-+----	7.21e-06	0.0195587	0.83		-0.5032
5217	PFN2	0.70895	-3.47841	-------	0.000504396	1	0.0125337	-5.71271	1.11e-08	--?---	2.11e-07	0.000261632	0.77	-0.6929	-0.5487
3985	LIMK2	0.785964	-3.47658	-??----	0.000507862	1	0.0125748	5.00587	5.56e-07	++?+++	5.17e-06	0.013085	1.25	0.6301
8562	DENR	0.819605	-3.47625	-+?---?	0.000508476	1	0.0125748	-5.93781	2.89e-09	--?---	7.1e-08	6.8e-05	0.8	-0.6776	-0.5146
9169	SCAF11	1.47982	3.4755	+++??-?	0.000509899	1	0.0125799
55228	PNMAL1	0.648048	-3.46992	--?---?	0.000520619	1	0.0128139	-5.37531	7.65e-08	------	1.01e-06	0.00179892	0.76		-0.4958
55695	NSUN5	1.1745	3.4692	++?-+??	0.000522008	1	0.0128176
6938	TCF12	1.19416	3.46811	++-+++-	0.000524131	1	0.0128393
83988	NCALD	0.591587	-3.46707	--?---?	0.000526163	1	0.0128587	-7.77471	7.55e-15	------	3.23e-12	1.78e-10	0.66	-0.7312	-0.5916
55255	WDR41	1.30747	3.4657	++?+?+?	0.000528858	1	0.0128942
9927	MFN2	0.826807	-3.46429	--?---?	0.000531628	1	0.0129313
9868	TOMM70	0.736676	-3.46305	------?	0.000534086	1	0.0129607	-5.95833	2.55e-09	--?---	6.48e-08	6e-05	0.78	-0.6432	-0.5099
6456	SH3GL2	0.637097	-3.45962	-------	0.000540939	1	0.0130963
8745	ADAM23	0.537046	-3.45839	--???-?	0.000543417	1	0.013112	-5.20431	1.95e-07	--?---	2.14e-06	0.00458172	0.8	-0.6756	-0.6042
22846	VASH1	1.24766	3.45804	++?+++?	0.000544119	1	0.013112
283209	PGM2L1	0.38198	-3.45714	-?-????	0.000545947	1	0.0131255	-5.2947	1.19e-07	--?---	1.43e-06	0.00280504	0.75	-0.6355	-0.5304
10376	TUBA1B	0.661845	-3.45633	------?	0.000547588	1	0.0131345
1496	CTNNA2	0.727539	-3.45512	---+---	0.000550044	1	0.0131474
5214	PFKP	0.670084	-3.45374	--?----	0.000552871	1	0.0131474
11041	B4GAT1	0.711578	-3.45299	-------	0.000554415	1	0.0131474	-5.27153	1.35e-07	------	1.59e-06	0.0031834	0.83	-0.5915	-0.5199
51617	HMP19	0.553985	-3.45296	-?-??-?	0.000554468	1	0.0131474	-6.76265	1.35e-11	------	9.78e-10	3.19e-07	0.71	-0.6902	-0.5803
552889	ATXN7L3B	0.734358	-3.45364	------?	0.00055308	1	0.0131474
51142	CHCHD2	0.748052	-3.44973	-+-----	0.000561156	1	0.0132756	-6.42547	1.31e-10	------	5.95e-09	3.09e-06	0.85	-0.6597	-0.5491
7167	TPI1	0.747741	-3.44682	-------	0.000567233	1	0.0133888
7259	TSPYL1	0.648398	-3.44614	------?	0.00056866	1	0.013392
526	ATP6V1B2	0.630055	-3.43918	--?----	0.000583488	1	0.013679	-4.87945	1.06e-06	--?---	8.92e-06	0.0250318	0.67	-0.647	-0.51
5863	RGL2	1.19804	3.43974	++?++++	0.000582268	1	0.013679
4345	CD200	0.673053	-3.437	--?---?	0.000588191	1	0.0137581	-5.45092	5.01e-08	--?---	7.15e-07	0.00117908	0.71	-0.6572	-0.5619
834	CASP1	1.2384	3.42723	++?-++?	0.000609763	1	0.0139586	7.07995	1.44e-12	++?+++	1.66e-10	3.39e-08	1.25	0.6033	0.474
3612	IMPA1	0.699613	-3.42778	-+-----	0.000608545	1	0.0139586
3895	KTN1	1.20148	3.42705	+++++-+	0.000610176	1	0.0139586	7.40136	1.35e-13	++?+++	2.91e-11	3.17e-09	1.53	0.7064	0.6059
4947	OAZ2	0.69318	-3.42834	-+--?--	0.000607294	1	0.0139586	-5.32928	9.86e-08	--?---	1.23e-06	0.00232007	0.86
8618	CADPS	0.374989	-3.42656	-????-?	0.00061127	1	0.0139586	-4.82033	1.43e-06	--?---	1.15e-05	0.033724	0.68		-0.5074
10632	ATP5L	0.728359	-3.42679	-+-----	0.00061075	1	0.0139586	-5.14023	2.74e-07	--?---	2.86e-06	0.00645655	0.82	-0.655	-0.5238
22920	KIFAP3	0.656468	-3.42788	--?-?--	0.000608311	1	0.0139586	-5.41286	6.2e-08	------	8.53e-07	0.00145949	0.74	-0.6435	-0.4917
23239	PHLPP1	1.18779	3.43031	++-+++?	0.00060289	1	0.0139586
23764	MAFF	1.61252	3.4308	++++++-	0.000601805	1	0.0139586	7.14766	8.83e-13	++?+++	1.19e-10	2.08e-08	1.79	0.6636	0.4991
54541	DDIT4	1.52962	3.4271	++++++?	0.000610072	1	0.0139586	6.54949	5.77e-11	++?+++	3.07e-09	1.36e-06	1.59	0.6907	0.5565
81533	ITFG1	0.720055	-3.42643	-??-?-?	0.00061158	1	0.0139586	-6.00167	1.95e-09	--?---	5.2e-08	4.6e-05	0.7	-0.6902	-0.5423
1028	CDKN1C	1.42957	3.42557	++?-+++	0.000613517	1	0.013972	4.93485	8.02e-07	++++++	6.98e-06	0.0188744	1.25
5250	SLC25A3	0.723976	-3.42364	-+-----	0.000617877	1	0.0140404	-5.7465	9.11e-09	--?---	1.78e-07	0.000214382	0.81	-0.6513	-0.5448
23014	FBXO21	0.734568	-3.42263	---+--?	0.000620175	1	0.0140618
140597	TCEAL2	0.702525	-3.4219	------?	0.000621841	1	0.0140688
5757	PTMA	1.25892	3.41963	+++++++	0.000627054	1	0.0141558
28513	CDH19	1.3354	3.41474	++??++-	0.000638425	1	0.0143812
3420	IDH3B	0.659151	-3.41397	-+----?	0.000640241	1	0.0143908
1400	CRMP1	0.630682	-3.40667	--?????	0.000657611	1	0.0147493
1195	CLK1	1.25667	3.40398	++-+++-	0.00066412	1	0.0148631
9446	GSTO1	0.723819	-3.40205	-+-----	0.000668822	1	0.014936
54542	RC3H2	0.751025	-3.40117	+--?--?	0.000670983	1	0.014936
81856	ZNF611	1.46443	3.40088	+++?++?	0.000671701	1	0.014936
8395	PIP5K1B	0.668664	-3.39977	-++----	0.000674424	1	0.0149644
7580	ZNF32	1.20364	3.39881	++?-++?	0.000676795	1	0.0149849
6670	SP3	1.39468	3.39497	+++-++?	0.000686365	1	0.0151644
9556	C14orf2	0.679217	-3.39394	-+-----	0.000688957	1	0.0151893	-5.32005	1.04e-07	------	1.28e-06	0.00244097	0.83	-0.6305	-0.5212
3759	KCNJ2	1.18471	3.39241	++-++++	0.000692806	1	0.0152094
57185	NIPAL3	0.482235	-3.39258	-?-????	0.000692367	1	0.0152094
26999	CYFIP2	0.689019	-3.39131	--?---?	0.0006956	1	0.0152171
55274	PHF10	1.04935	3.39092	++-+++?	0.000696596	1	0.0152171	6.62156	3.55e-11	++?+++	2.08e-09	8.36e-07	1.22	0.7009	0.5933
55818	KDM3A	1.31884	3.39054	++?+++?	0.00069756	1	0.0152171
3017	HIST1H2BD	1.46397	3.38766	++?+??+	0.00070491	1	0.0152851	8.10821	4.44e-16	++++++	3.37e-13	1.04e-11	1.46		0.5037
3184	HNRNPD	0.762794	-3.3876	-+-----	0.000705064	1	0.0152851
23181	DIP2A	1.2494	3.38759	++??++?	0.000705102	1	0.0152851
10129	FRY	0.775749	-3.38534	--?---+	0.000710896	1	0.0153785
5175	PECAM1	1.32807	3.38461	++-++++	0.000712807	1	0.0153877	5.91282	3.36e-09	++?++?	7.98e-08	7.91e-05	1.3	0.6527	0.5273
1410	CRYAB	1.13474	3.37734	++--++-	0.0007319	1	0.015513	5.57045	2.54e-08	++++++	4.1e-07	0.000597844	1.33		0.4592
5529	PPP2R5E	0.704986	-3.38021	---?---	0.000724317	1	0.015513
9805	SCRN1	0.71889	-3.37832	-+----?	0.000729306	1	0.015513
10330	CNPY2	0.810017	-3.37772	-+?----	0.000730898	1	0.015513
23077	MYCBP2	0.70825	-3.37762	------?	0.000731156	1	0.015513
23266	ADGRL2	0.771919	-3.3788	--?-?-?	0.000728041	1	0.015513
65009	NDRG4	0.61611	-3.37967	-------	0.000725719	1	0.015513	-6.20543	5.45e-10	------	1.85e-08	1.28e-05	0.77	-0.661	-0.5588
85445	CNTNAP4	0.469577	-3.37727	-?-????	0.000732086	1	0.015513
119710	C11orf74	0.4504	-3.37974	-?-????	0.000725554	1	0.015513
8499	PPFIA2	0.577046	-3.37366	-?-????	0.000741761	1	0.015648
23312	DMXL2	0.693465	-3.37332	--?---?	0.000742666	1	0.015648	-5.04185	4.61e-07	--?---	4.41e-06	0.0108484	0.74	-0.6508	-0.5222
127933	UHMK1	0.367669	-3.3732	-?-????	0.000742986	1	0.015648
412	STS	0.700871	-3.37185	---?--?	0.000746643	1	0.0156577
8773	SNAP23	1.31053	3.37228	+++-++-	0.000745481	1	0.0156577	5.92747	3.08e-09	++?+++	7.45e-08	7.24e-05	1.27	0.6942	0.5754
23167	EFR3A	0.680012	-3.37081	------?	0.000749489	1	0.0156577
27018	BEX3	0.772243	-3.3713	-----+-	0.00074814	1	0.0156577	-5.1798	2.22e-07	--?---	2.4e-06	0.00522671	0.85	-0.6516	-0.5462
23301	EHBP1	0.748998	-3.36534	-+?---?	0.000764501	1	0.0159392	-4.76248	1.91e-06	------	1.47e-05	0.0449968	0.86
7226	TRPM2	0.802288	-3.36154	--?????	0.00077509	1	0.0161275
388677	NOTCH2NL	1.61156	3.3601	+?+??+?	0.000779148	1	0.0161794
8540	AGPS	0.646443	-3.35831	-?-??-?	0.000784208	1	0.0162039
9143	SYNGR3	0.571705	-3.35807	--??---	0.000784878	1	0.0162039
63876	PKNOX2	0.79967	-3.35802	--?-+-?	0.000785017	1	0.0162039	-5.02562	5.02e-07	--?---	4.74e-06	0.0118076	0.86		-0.4509
5573	PRKAR1A	0.652332	-3.35705	-+-----	0.000787802	1	0.016229
47	ACLY	0.799649	-3.35514	-+?----	0.000793246	1	0.0162443	-5.24196	1.59e-07	--?---	1.81e-06	0.00373838	0.84	-0.6042	-0.4963
5019	OXCT1	0.787187	-3.35546	--?-?--	0.000792319	1	0.0162443	-5.08323	3.71e-07	--?---	3.67e-06	0.00873115	0.77	-0.6212	-0.5111
89122	TRIM4	1.94348	3.35562	+?+????	0.000791862	1	0.0162443
23089	PEG10	0.599801	-3.35025	-+?---?	0.000807383	1	0.0165012
2805	GOT1	0.474748	-3.34968	----???	0.000809038	1	0.0165025	-6.06187	1.35e-09	------	3.89e-08	3.17e-05	0.71	-0.655	-0.5409
9296	ATP6V1F	0.851536	-3.34557	--?----	0.00082113	1	0.0167162
1740	DLG2	0.792789	-3.34331	-????-?	0.000827866	1	0.0167971
51185	CRBN	0.712147	-3.34314	-+-----	0.000828348	1	0.0167971
81606	LBH	0.694658	-3.34229	-+?---?	0.000830915	1	0.0168163	-6.40748	1.48e-10	--?---	6.5e-09	3.48e-06	0.79	-0.6588	-0.4745
2026	ENO2	0.641849	-3.33879	-------	0.000841452	1	0.0169964	-4.86966	1.12e-06	------	9.29e-06	0.0263042	0.83	-0.6406	-0.5662
57821	CCDC181	0.778795	-3.33713	-????-?	0.000846491	1	0.0170649
4176	MCM7	1.22195	3.33512	+???++?	0.000852638	1	0.017148	5.27783	1.31e-07	++?+++	1.55e-06	0.00307596	1.21
8604	SLC25A12	0.741394	-3.3347	--?----	0.000853924	1	0.017148
57575	PCDH10	0.412993	-3.33222	-?-????	0.000861568	1	0.017268	-5.63737	1.73e-08	------	3.01e-07	0.000406283	0.86		-0.5068
6625	SNRNP70	1.21983	3.32914	++?++++	0.000871141	1	0.0173926
79963	ABCA11P	0.730537	-3.3296	-????-?	0.000869698	1	0.0173926	-5.94329	2.79e-09	--?--?	6.92e-08	6.57e-05	0.8
5824	PEX19	0.775603	-3.32821	-??-?--	0.000874062	1	0.0174174	-6.25101	4.08e-10	--?---	1.47e-08	9.6e-06	0.88		-0.4577
27349	MCAT	0.754656	-3.32697	-??-???	0.000877962	1	0.0174615	-4.9252	8.43e-07	--?---	7.3e-06	0.0198294	0.83	-0.7106	-0.5792
56829	ZC3HAV1	1.41702	3.32637	++??+-?	0.000879854	1	0.0174656	5.83239	5.46e-09	++++++	1.17e-07	0.000128563	1.23	0.6263	0.5253
6812	STXBP1	0.676094	-3.32432	--?---+	0.000886359	1	0.0175195
65008	MRPL1	0.400609	-3.32391	-?-????	0.000887642	1	0.0175195	-6.43836	1.21e-10	------	5.55e-09	2.84e-06	0.81	-0.6251	-0.5076
80303	EFHD1	1.2868	3.3249	++?+++?	0.000884516	1	0.0175195	5.45961	4.77e-08	++++++	6.86e-07	0.00112282	1.36	0.6018	0.4896
27071	DAPP1	1.56976	3.3232	??+?++?	0.000889896	1	0.0175306	4.86439	1.15e-06	+++++-	9.52e-06	0.0270147	1.21
27065	NSG1	0.640215	-3.32204	-+?----	0.000893626	1	0.0175707	-5.03683	4.73e-07	--?---	4.51e-06	0.0111367	0.71
55022	PID1	0.724226	-3.32102	-+?---?	0.000896877	1	0.0176012	-5.94702	2.73e-09	------	6.81e-08	6.43e-05	0.81	-0.6038	-0.4413
55540	IL17RB	1.2874	3.32021	++?-+-?	0.000899493	1	0.0176192	5.00505	5.58e-07	++?++-	5.19e-06	0.0131412	1.44	0.6713	0.5604
28978	TMEM14A	0.748609	-3.31966	--?---?	0.000901261	1	0.0176205	-4.85056	1.23e-06	--?---	1.01e-05	0.0289681	0.79	-0.6081	-0.5033
1407	CRY1	1.31389	3.31628	++??++?	0.000912234	1	0.0176383
6905	TBCE	0.820913	-3.315	-+?----	0.000916434	1	0.0176383
6929	TCF3	1.20824	3.31429	+?+?++?	0.000918751	1	0.0176383	5.22776	1.72e-07	++++++	1.93e-06	0.00403714	1.24	0.6127	0.5386
7779	SLC30A1	1.25151	3.31609	++?+?+?	0.000912856	1	0.0176383
9804	TOMM20	0.665716	-3.31521	-+-----	0.000915755	1	0.0176383	-6.17805	6.49e-10	------	2.16e-08	1.53e-05	0.73	-0.6599	-0.5149
10133	OPTN	0.748183	-3.31787	-+----+	0.000907071	1	0.0176383
10985	GCN1	1.10953	3.31416	++?-++?	0.000919193	1	0.0176383
51143	DYNC1LI1	0.794699	-3.31873	-+?----	0.000904294	1	0.0176383	-5.26487	1.4e-07	------	1.64e-06	0.00330099	0.78	-0.645	-0.4992
84342	COG8	1.73559	3.31682	+?+????	0.00091049	1	0.0176383
127703	C1orf216	0.718809	-3.31772	--?---?	0.000907567	1	0.0176383
7018	TF	1.17022	3.31269	++--+++	0.000924046	1	0.017666
23300	ATMIN	0.842497	-3.31288	-+?---?	0.000923395	1	0.017666
4013	VWA5A	0.751873	-3.31195	-+-----	0.000926473	1	0.0176732
5695	PSMB7	0.81047	-3.31154	-+-----	0.000927837	1	0.0176732	-5.13627	2.8e-07	------	2.9e-06	0.00659417	0.86	-0.6458	-0.5095
3149	HMGB3	0.870204	-3.30955	--+----	0.00093446	1	0.0177667	-6.75706	1.41e-11	--?---	1.01e-09	3.31e-07	0.78	-0.6056	-0.4833
7857	SCG2	0.497406	-3.30777	-+?----	0.000940431	1	0.0178475	-6.02191	1.72e-09	--?---	4.69e-08	4.06e-05	0.63	-0.6745	-0.5195
9924	PAN2	1.42284	3.30718	+??+???	0.000942417	1	0.0178525	5.42968	5.65e-08	++++++	7.9e-07	0.00132841	1.18	0.6812	0.5803
6328	SCN3A	0.560295	-3.30447	---??-?	0.000951557	1	0.0178624
7275	TUB	0.387131	-3.30543	-?-????	0.000948307	1	0.0178624	-5.67925	1.35e-08	-----+	2.46e-07	0.000318321	0.9		-0.4749
8851	CDK5R1	0.614559	-3.30468	----+--	0.000950864	1	0.0178624	-5.43638	5.44e-08	-----+	7.65e-07	0.00127944	0.86	-0.6544	-0.5102
8899	PRPF4B	1.10915	3.30553	++--+++	0.000947975	1	0.0178624
10735	STAG2	1.06901	3.30535	++-+++-	0.000948579	1	0.0178624
6506	SLC1A2	0.720521	-3.30293	---?--+	0.000956811	1	0.0178962
122553	TRAPPC6B	0.360573	-3.3034	-?-????	0.000955188	1	0.0178962	-4.83389	1.34e-06	------	1.09e-05	0.0315049	0.81		-0.4933
6015	RING1	1.10595	3.30187	++?++++	0.00096043	1	0.0179315
331	XIAP	0.672366	-3.30028	-?-??-?	0.000965887	1	0.0180009
4695	NDUFA2	0.734286	-3.29929	-+-----	0.000969302	1	0.0180321
3609	ILF3	0.868721	-3.29656	--?----	0.000978765	1	0.0180999
5901	RAN	0.635839	-3.29675	-+-----	0.000978088	1	0.0180999	-5.76386	8.22e-09	------	1.63e-07	0.000193439	0.79	-0.6384	-0.4639
7289	TULP3	1.18172	3.29513	++??+-+	0.000983761	1	0.0180999
7965	AIMP2	0.763881	-3.29513	-+-----	0.000983745	1	0.0180999	-5.79147	6.98e-09	--?---	1.43e-07	0.000164172	0.87
63877	FAM204A	0.467242	-3.29765	-?-????	0.000974959	1	0.0180999
64081	PBLD	0.737506	-3.29557	-???---	0.000982208	1	0.0180999
79365	BHLHE41	1.36461	3.29473	++?+++?	0.000985171	1	0.0180999	5.6685	1.44e-08	+++++-	2.6e-07	0.000338952	1.21
11130	ZWINT	0.774073	-3.29197	-+-----	0.000994883	1	0.0182177
81689	ISCA1	0.707182	-3.29191	-+----?	0.000995097	1	0.0182177
5909	RAP1GAP	0.769701	-3.2888	--?----	0.00100615	1	0.0182997
10128	LRPPRC	0.770665	-3.28903	-+?---?	0.00100533	1	0.0182997	-4.91694	8.79e-07	-+----	7.59e-06	0.020685	0.84	-0.5989	-0.4752
29088	MRPL15	0.721975	-3.28984	-+?---?	0.00100245	1	0.0182997	-6.26071	3.83e-10	------	1.4e-08	9.02e-06	0.77	-0.6563	-0.5374
56904	SH3GLB2	0.675945	-3.28866	--?-???	0.00100664	1	0.0182997
53	ACP2	0.839853	-3.28655	-+?----	0.00101423	1	0.0183091	-5.52535	3.29e-08	------	5.07e-07	0.000773726	0.83	-0.6475	-0.5393
8672	EIF4G3	0.784955	-3.28693	------+	0.00101285	1	0.0183091
56895	AGPAT4	0.435916	-3.28693	-?-????	0.00101286	1	0.0183091
80762	NDFIP1	0.643651	-3.28748	-------	0.00101087	1	0.0183091
23032	USP33	0.672949	-3.28553	------?	0.00101791	1	0.0183436
10927	SPIN1	0.633665	-3.28273	---???-	0.00102806	1	0.0184624	-5.24018	1.6e-07	--?---	1.83e-06	0.00377477	0.85		-0.5072
57062	DDX24	0.753453	-3.28297	-------	0.0010272	1	0.0184624
23349	PHF24	0.714935	-3.2819	--???-?	0.00103109	1	0.0184846
1968	EIF2S3	0.407083	-3.27781	-?-????	0.00104616	1	0.0186955
4293	MAP3K9	0.655512	-3.27751	------?	0.00104728	1	0.0186955
5793	PTPRG	0.679709	-3.27676	-?-??-?	0.00105006	1	0.0186955
6728	SRP19	0.736223	-3.27722	-+-----	0.00104833	1	0.0186955
94081	SFXN1	0.776841	-3.27567	-?-?--?	0.00105411	1	0.0187353	-4.76614	1.88e-06	-+?---	1.44e-05	0.0441868	0.89	-0.6578	-0.5288
51552	RAB14	0.730713	-3.27339	-------	0.00106265	1	0.0188548	-5.8323	5.47e-09	--?---	1.17e-07	0.000128633	0.8	-0.6465	-0.5384
23065	EMC1	0.766462	-3.27024	-????-?	0.00107455	1	0.0190271	-6.76639	1.32e-11	------	9.56e-10	3.11e-07	0.84
80205	CHD9	1.04809	3.26985	++-+++?	0.00107604	1	0.0190271
3635	INPP5D	1.30086	3.26883	++?+??+	0.00107993	1	0.0190635	6.63723	3.2e-11	?+?+++	1.89e-09	7.52e-07	1.25	0.6604	0.5555
4189	DNAJB9	0.674231	-3.26495	-+-----	0.00109484	1	0.0192938
5911	RAP2A	0.724046	-3.26391	---+-?-	0.00109884	1	0.0192986
10904	BLCAP	0.737857	-3.26423	------+	0.00109764	1	0.0192986
4715	NDUFB9	0.508526	-3.26279	-?-????	0.00110322	1	0.0193236
154661	RUNDC3B	0.721795	-3.26259	---?--?	0.00110399	1	0.0193236	-4.95844	7.11e-07	------	6.31e-06	0.0167212	0.85		-0.4479
3189	HNRNPH3	1.09884	3.26021	++-+++?	0.0011133	1	0.0194213
7052	TGM2	1.30792	3.2602	++?+++-	0.00111332	1	0.0194213
4848	CNOT2	1.19115	3.25622	++-+++-	0.00112907	1	0.0196502	5.21996	1.79e-07	-+?+++	2.01e-06	0.00421103	1.01	0.6916	0.5858
10447	FAM3C	0.581515	-3.25593	------?	0.00113024	1	0.0196502	-4.84659	1.26e-06	-+?---	1.03e-05	0.0295548	0.78	-0.6669	-0.5217
221749	PXDC1	1.27057	3.25509	++?++-?	0.00113355	1	0.0196748	5.36767	7.98e-08	++?+++	1.04e-06	0.00187675	1.4
11007	CCDC85B	0.772057	-3.25458	--?-??+	0.00113561	1	0.0196775
84280	BTBD10	0.390727	-3.25262	-?-????	0.00114347	1	0.0197807
26146	TRAF3IP1	0.615724	-3.2504	-?-????	0.00115242	1	0.0199023
10404	CPQ	1.26559	3.24947	++?-?++	0.00115619	1	0.0199321	7.8767	3.33e-15	++++++	1.82e-12	7.84e-11	1.28
10766	TOB2	1.29548	3.24892	++++++?	0.00115842	1	0.0199321	5.38002	7.45e-08	++?+++	9.84e-07	0.00175245	1.32	0.7013	0.5699
23157	2006-09-01	0.651595	-3.24856	--?---?	0.00115991	1	0.0199321
64769	MEAF6	0.788309	-3.24763	--?---?	0.00116372	1	0.0199644	-7.02072	2.21e-12	------	2.36e-10	5.19e-08	0.81	-0.667	-0.5461
8243	SMC1A	1.2764	3.24664	++?+++-	0.00116776	1	0.0200005
26037	SIPA1L1	0.606698	-3.24527	--?????	0.0011734	1	0.0200411
84259	DCUN1D5	0.521246	-3.24512	-?-????	0.001174	1	0.0200411	-5.96596	2.43e-09	------	6.26e-08	5.72e-05	0.86
78991	PCYOX1L	0.669006	-3.24438	-????-?	0.00117707	1	0.0200605	-8.57164	0	------	0	0	0.67	-0.6449	-0.5866
481	ATP1B1	0.608982	-3.23922	-------	0.00119855	1	0.0203931
11329	STK38	1.18855	3.23744	++?++++	0.00120608	1	0.0204876	6.93893	3.95e-12	++++++	3.67e-10	9.3e-08	1.18	0.7192	0.5722
23272	FAM208A	1.21701	3.23611	++-+++?	0.00121171	1	0.0205494
5306	PITPNA	0.827133	-3.23484	-+?----	0.00121712	1	0.0205879	-6.51696	7.17e-11	------	3.7e-09	1.69e-06	0.86	-0.7082	-0.5646
51138	COPS4	0.742436	-3.23464	-+?----	0.00121795	1	0.0205879	-5.16918	2.35e-07	------	2.5e-06	0.00553239	0.78
273	AMPH	0.562406	-3.23386	--???--	0.00122131	1	0.020611
60558	GUF1	0.774428	-3.23314	-????-?	0.00122436	1	0.020629	-4.82723	1.38e-06	--?---	1.12e-05	0.0325754	0.81	-0.6192	-0.4672
26020	LRP10	1.2742	3.23252	++?+?+?	0.00122702	1	0.0206403	5.56961	2.55e-08	++?+++	4.11e-07	0.000600734	1.25	0.6867	0.5505
2036	EPB41L1	0.673818	-3.2309	----+-?	0.001234	1	0.020724
22877	MLXIP	1.24447	3.22562	+-??++?	0.001257	1	0.0210421	5.69325	1.25e-08	++?+++	2.29e-07	0.000293285	1.2
23013	SPEN	1.11086	3.2257	+--+++?	0.00125664	1	0.0210421	5.89902	3.66e-09	++++++	8.43e-08	8.6e-05	1.23	0.65	0.526
10767	HBS1L	0.686831	-3.22249	----+--	0.00127081	1	0.0212167
93643	TJAP1	1.20501	3.22233	++?+++?	0.00127153	1	0.0212167
8334	HIST1H2AC	1.28076	3.22111	++-+++-	0.00127697	1	0.0212733	5.17352	2.3e-07	++?+++	2.46e-06	0.00540551	1.34		0.527
4704	NDUFA9	0.779475	-3.21891	-???--?	0.0012868	1	0.0213341	-6.57506	4.86e-11	------	2.68e-09	1.14e-06	0.82	-0.6673	-0.502
10241	CALCOCO2	1.19879	3.21947	++?+++-	0.00128426	1	0.0213341	7.39505	1.41e-13	++?+++	2.97e-11	3.33e-09	1.26	0.7272	0.6133
81034	SLC25A32	0.739639	-3.21935	-????--	0.00128481	1	0.0213341
22933	SIRT2	1.18399	3.21831	++?++++	0.00128947	1	0.0213443
3897	L1CAM	0.569035	-3.21768	---???+	0.00129232	1	0.0213573
1453	CSNK1D	0.862024	-3.21574	--?---?	0.00130109	1	0.0214681
8493	PPM1D	1.37351	3.21382	+???++?	0.00130983	1	0.0215436
79811	SLTM	1.21268	3.21406	++?-++?	0.00130872	1	0.0215436
55771	PRR11	1.5817	3.21163	+?+?++?	0.00131983	1	0.0216737
5420	PODXL	1.29474	3.21013	+++++++	0.00132677	1	0.0217188
58477	SRPRB	0.730647	-3.2102	-+-----	0.00132643	1	0.0217188	-4.90358	9.41e-07	--+---	8.06e-06	0.0221431	0.89
30008	EFEMP2	1.23329	3.2077	++?++++	0.001338	1	0.021868
55754	TMEM30A	0.755506	-3.20691	------?	0.0013417	1	0.021894
996	CDC27	0.799613	-3.20634	-+----?	0.00134437	1	0.0219031	-6.03163	1.62e-09	------	4.49e-08	3.82e-05	0.83	-0.613	-0.4762
8766	RAB11A	0.775096	-3.2046	-+?----	0.00135248	1	0.0219981	-4.90721	9.24e-07	------	7.93e-06	0.0217372	0.74	-0.6484	-0.538
51451	LCMT1	0.828725	-3.20419	--?---?	0.00135445	1	0.0219981	-4.81528	1.47e-06	--?---	1.17e-05	0.034588	0.87	-0.6053	-0.5294
529	ATP6V1E1	0.701192	-3.20211	-------	0.00136427	1	0.0220687	-5.60195	2.12e-08	--?---	3.53e-07	0.000498734	0.76	-0.6625	-0.5629
4700	NDUFA6	0.748815	-3.20191	-+-----	0.00136518	1	0.0220687	-5.21642	1.82e-07	--?---	2.04e-06	0.0042923	0.88	-0.6489	-0.5263
339487	ZBTB8OS	0.563854	-3.20256	-?-????	0.00136212	1	0.0220687
1052	CEBPD	1.26177	3.20048	++?+++-	0.00137198	1	0.022144	7.16369	7.85e-13	++?+++	1.1e-10	1.85e-08	1.64	0.6714	0.5094
4289	MKLN1	1.83247	3.19937	+?+????	0.00137729	1	0.0221607	5.94566	2.75e-09	++?+++	6.84e-08	6.48e-05	1.24	0.6651	0.5786
23022	PALLD	1.36506	3.19959	++++-+?	0.00137625	1	0.0221607	5.86579	4.47e-09	++?+++	9.96e-08	0.000105177	1.44	0.689	0.5727
2173	FABP7	0.75744	-3.19839	--?+---	0.00138196	1	0.0221816
6439	SFTPB	1.42733	3.1982	+?+?++?	0.00138287	1	0.0221816
7803	PTP4A1	0.685555	-3.19711	-+----?	0.00138812	1	0.022197	-7.06414	1.62e-12	--?---	1.83e-10	3.8e-08	0.71	-0.621	-0.512
138046	RALYL	0.471589	-3.19722	-????-?	0.0013876	1	0.022197
381	ARF5	0.77777	-3.19503	--?-?-?	0.00139815	1	0.0222605	-8.35113	0	------	0	0	0.78	-0.6948	-0.6016
6195	RPS6KA1	1.22297	3.19495	+++++?+	0.00139853	1	0.0222605	4.96216	6.97e-07	++?+++	6.22e-06	0.0164034	1.11	0.5928	0.4594
55176	SEC61A2	0.800669	-3.19568	-??---?	0.001395	1	0.0222605	-5.52962	3.21e-08	------	4.97e-07	0.000755152	0.85	-0.6038	-0.5148
57180	ACTR3B	0.7601	-3.19207	--???--	0.00141256	1	0.0224492	-6.45752	1.06e-10	--?---	4.98e-09	2.5e-06	0.75	-0.6829	-0.5807
6901	TAZ	1.11128	3.19145	+-?++?+	0.0014156	1	0.0224631	5.34068	9.26e-08	++?+++	1.17e-06	0.00217885	1.1	0.678	0.5733
9217	VAPB	0.726708	-3.19088	-+----+	0.00141842	1	0.0224734
5934	RBL2	1.09478	3.19005	++-++++	0.00142246	1	0.0225032
25	ABL1	1.16494	3.18192	++?-+++	0.00146305	1	0.0230957	5.81746	5.97e-09	++?+++	1.26e-07	0.000140586	1.22	0.6728	0.5052
54431	DNAJC10	0.560695	-3.18165	-?-????	0.00146438	1	0.0230957
10723	SLC12A7	1.19478	3.18112	++?-+?+	0.00146706	1	0.0231028	5.22959	1.7e-07	+++++-	1.92e-06	0.00399739	1.32		0.469
8503	PIK3R3	0.776856	-3.17787	-+?----	0.00148359	1	0.0232973	5.5887	2.29e-08	-+?++-	3.77e-07	0.000538315	1.04
23530	NNT	0.788339	-3.17781	--???-?	0.0014839	1	0.0232973	-4.85033	1.23e-06	-+?---	1.01e-05	0.0290016	0.86	-0.6022	-0.4757
445	ASS1	0.846372	-3.17475	--?---+	0.00149967	1	0.0234737
124801	LSM12	0.849531	-3.17487	--?---?	0.00149905	1	0.0234737
9946	CRYZL1	0.834361	-3.17378	-+?----	0.00150468	1	0.0235166
51400	PPME1	0.880502	-3.17167	--?---+	0.00151565	1	0.0236219	-5.62536	1.85e-08	------	3.17e-07	0.000435597	0.82		-0.5427
80006	TRAPPC13	0.682517	-3.17161	-????-?	0.00151597	1	0.0236219	-5.32434	1.01e-07	-+?---	1.26e-06	0.00238412	0.84
2648	KAT2A	1.16962	3.17066	+-?++?+	0.0015209	1	0.0236276
3621	ING1	1.22223	3.17095	+????+?	0.00151943	1	0.0236276
9711	RUBCN	1.13095	3.17019	++?-++?	0.00152338	1	0.0236307
3131	HLF	0.589175	-3.16519	--???-?	0.0015498	1	0.0240046
85403	EAF1	0.505312	-3.16406	-?-????	0.00155583	1	0.0240619	-5.34805	8.89e-08	--?---	1.14e-06	0.00209201	0.79	-0.6397	-0.4705
23469	PHF3	1.15846	3.16344	++?-++?	0.00155915	1	0.0240691
23646	PLD3	0.567178	-3.16311	--?????	0.00156094	1	0.0240691
22884	WDR37	0.784478	-3.16174	--?---?	0.00156827	1	0.0241463
476	ATP1A1	0.75576	-3.15851	--?----	0.00158578	1	0.0242879
5710	PSMD4	0.786772	-3.15951	-+-----	0.00158036	1	0.0242879
7905	REEP5	0.679538	-3.1584	-----+?	0.00158635	1	0.0242879
23428	SLC7A8	0.876938	-3.15831	--?-?--	0.00158685	1	0.0242879	-5.09636	3.46e-07	------	3.46e-06	0.0081472	0.89
5861	RAB1A	0.702435	-3.15596	-+-----	0.00159972	1	0.0244048
51299	NRN1	0.668746	-3.15562	--?----	0.00160155	1	0.0244048	-8.08382	6.66e-16	------	4.61e-13	1.57e-11	0.67	-0.7439	-0.6127
126298	IRGQ	0.862721	-3.15624	--?-?-?	0.0015982	1	0.0244048
4137	MAPT	1.23008	3.15395	+++++++	0.00161078	1	0.0245094	-6.24532	4.23e-10	--?--+	1.51e-08	9.95e-06	0.84	-0.6634	-0.5571
1964	EIF1AX	0.703776	-3.15009	-------	0.00163221	1	0.0247628
8349	HIST2H2BE	1.33562	3.15018	++?++++	0.0016317	1	0.0247628
9118	INA	0.567566	-3.14803	--?----	0.00164375	1	0.0249014	-4.74524	2.08e-06	------	1.58e-05	0.0490038	0.76		-0.4996
1861	TOR1A	0.843054	-3.14701	--?-?-?	0.00164951	1	0.0249067	-6.72462	1.76e-11	--?---	1.19e-09	4.14e-07	0.87	-0.639	-0.5296
10443	N4BP2L2	1.08416	3.14669	++--++?	0.00165131	1	0.0249067
23200	ATP11B	1.19504	3.14722	++??++?	0.00164831	1	0.0249067
6383	SDC2	0.815443	-3.1459	-+?---?	0.00165575	1	0.0249374
103344931	LOC103344931	0.825409	-3.14466	-????-?	0.0016628	1	0.0250071
25777	SUN2	1.15912	3.14378	++?-++?	0.00166779	1	0.0250459	5.05228	4.37e-07	++?+++	4.21e-06	0.0102722	1.17	0.6655	0.5311
25830	SULT4A1	0.473885	-3.14312	???-?-?	0.00167157	1	0.0250663
10451	VAV3	0.73215	-3.14195	-+?----	0.00167827	1	0.0251304
10522	DEAF1	0.68694	-3.1397	--?-???	0.0016912	1	0.0252603
27345	KCNMB4	1.22467	3.13935	+-?+++-	0.00169324	1	0.0252603
253782	CERS6	0.671275	-3.13917	--??--?	0.00169426	1	0.0252603
3065	HDAC1	1.26382	3.1385	++?-+-+	0.00169815	1	0.0252749	5.14375	2.69e-07	++++++	2.81e-06	0.00633687	1.38	0.7125	0.5903
55140	ELP3	0.459797	-3.13816	-?-????	0.00170012	1	0.0252749
79624	ARMT1	0.595646	-3.13734	-?-??-?	0.00170488	1	0.0253094
57468	SLC12A5	0.64526	-3.13411	--?---+	0.00172375	1	0.025553
3798	KIF5A	0.643195	-3.13227	---+?-+	0.00173458	1	0.0256767
400949	FKSG49	1.27993	3.13119	+-++++?	0.00174101	1	0.0257352
26960	NBEA	0.702397	-3.13057	--?----	0.00174467	1	0.0257525
6611	SMS	0.758464	-3.12873	-+-----	0.00175565	1	0.0258598
9874	TLK1	0.706611	-3.12851	------+	0.00175693	1	0.0258598	-5.22783	1.72e-07	--?---	1.93e-06	0.00403561	0.87		-0.4613
4714	NDUFB8	0.801327	-3.12661	-+-----	0.00176836	1	0.0259912
10939	AFG3L2	0.845867	-3.12418	--???--	0.00178299	1	0.026169	-5.56807	2.58e-08	------	4.14e-07	0.000606076	0.85	-0.615	-0.5148
51542	VPS54	1.12531	3.12256	++?-++-	0.00179283	1	0.0262762
140	ADORA3	1.31978	3.12114	++?++++	0.00180151	1	0.026348	6.95279	3.58e-12	++?+++	3.41e-10	8.43e-08	1.31	0.65	0.5184
10294	DNAJA2	0.771104	-3.12031	--?-?--	0.00180662	1	0.026348
10947	AP3M2	0.820582	-3.1201	--?----	0.00180789	1	0.026348	-6.76886	1.3e-11	------	9.46e-10	3.05e-07	0.82	-0.6524	-0.5464
11179	ZNF277	1.53196	3.12058	+?+????	0.00180497	1	0.026348
4301	AFDN	0.587345	-3.11801	-?-????	0.00182079	1	0.0264986
401474	SAMD12	0.449265	-3.11732	-?-????	0.00182505	1	0.0265234
8706	B3GALNT1	0.60911	-3.11534	-????-?	0.00183735	1	0.026662	-5.90545	3.52e-09	--?---	8.21e-08	8.28e-05	0.77	-0.6222	-0.48
81831	NETO2	0.689203	-3.11495	--???-?	0.00183973	1	0.026662	-6.77185	1.27e-11	------	9.35e-10	2.99e-07	0.75	-0.6958	-0.5398
55617	TASP1	0.787286	-3.11306	-????-?	0.00185156	1	0.0267959	-7.1448	9.01e-13	--?---	1.19e-10	2.12e-08	0.72	-0.7314	-0.5831
56950	SMYD2	0.639945	-3.11059	--?-?-?	0.00186712	1	0.0269834
374354	NHLRC2	1.23617	3.11004	+???++?	0.00187063	1	0.0269965	4.94522	7.61e-07	++?+++	6.68e-06	0.0178968	1.12	0.695	0.5733
7769	ZNF226	0.760222	-3.10962	-+?----	0.00187328	1	0.0269971
744	MPPED2	0.740897	-3.1079	-+-?--+	0.00188419	1	0.0270791	-8.06289	6.66e-16	------	4.61e-13	1.57e-11	0.84	-0.7092	-0.5885
56954	NIT2	0.822492	-3.10828	-+?----	0.00188178	1	0.0270791	-5.36201	8.23e-08	------	1.07e-06	0.00193658	0.75
9331	B4GALT6	0.601858	-3.10612	-????-?	0.00189561	1	0.0272054	-6.07088	1.27e-09	--?---	3.72e-08	2.99e-05	0.71	-0.6735	-0.5372
26009	ZZZ3	1.17619	3.10473	++?+++?	0.00190455	1	0.0272959
22941	SHANK2	0.671219	-3.10382	---?--?	0.00191039	1	0.0273418	-5.19911	2e-07	-----+	2.2e-06	0.00471188	0.81	-0.5948	-0.5291
488	ATP2A2	0.720636	-3.10233	----+--	0.00192001	1	0.0274416	-6.0548	1.41e-09	------	4.05e-08	3.31e-05	0.77	-0.6726	-0.5462
2992	GYG1	0.770383	-3.0988	-+-----	0.00194306	1	0.0277004
29078	NDUFAF4	0.6636	-3.09874	-?--?-?	0.00194347	1	0.0277004
5178	PEG3	0.683275	-3.0973	------+	0.00195294	1	0.0277591
64863	METTL4	1.10949	3.0977	++?-++?	0.0019503	1	0.0277591
192683	SCAMP5	0.748317	-3.09629	--?---?	0.00195962	1	0.0278158
998	CDC42	0.660339	-3.09467	-+----+	0.00197029	1	0.0278355	-5.59249	2.24e-08	------	3.7e-07	0.000526699	0.69	-0.6451	-0.5508
3315	HSPB1	1.29521	3.09499	++?-+?-	0.00196816	1	0.0278355	6.76927	1.29e-11	++++++	9.46e-10	3.05e-07	1.52	0.6627	0.5252
4698	NDUFA5	0.749261	-3.09482	-+?----	0.00196931	1	0.0278355
10212	DDX39A	1.25851	3.09445	++?++-+	0.00197175	1	0.0278355	7.35574	1.9e-13	+++++-	3.6e-11	4.47e-09	1.2
23262	PPIP5K2	0.711416	-3.09201	-???--?	0.00198808	1	0.0279897	-5.3487	8.86e-08	--?---	1.13e-06	0.00208447	0.83		-0.4449
64837	KLC2	0.640746	-3.09213	--?????	0.00198726	1	0.0279897
84790	TUBA1C	0.694095	-3.09133	----+-?	0.00199259	1	0.0280153	-5.55327	2.8e-08	------	4.46e-07	0.000659703	0.8		-0.5461
50509	COL5A3	1.34221	3.09019	+???+??	0.00200031	1	0.0280857
51761	ATP8A2	0.618061	-3.08434	-????-?	0.00204001	1	0.0286043	-5.80728	6.35e-09	--?---	1.32e-07	0.00014941	0.7	-0.6319	-0.547
79966	SCD5	1.71694	3.08389	+++????	0.00204312	1	0.0286092
1268	CNR1	0.52916	-3.08215	--???-?	0.00205509	1	0.0287048	-6.29217	3.13e-10	--?---	1.18e-08	7.37e-06	0.84		-0.5043
25941	TPGS2	0.797598	-3.08188	-+?---?	0.002057	1	0.0287048
79152	FA2H	1.2765	3.08169	++?-+++	0.00205826	1	0.0287048
2821	GPI	0.686245	-3.08101	--?---?	0.00206299	1	0.0287258
4131	MAP1B	0.677526	-3.08068	------+	0.00206531	1	0.0287258
440574	MINOS1	0.407067	-3.08013	-?-????	0.00206911	1	0.0287401
5066	PAM	0.685146	-3.07785	-+-----	0.00208498	1	0.0289218	-5.1311	2.88e-07	------	2.97e-06	0.00677793	0.82	-0.6179
1965	EIF2S1	0.753728	-3.07487	-+-----	0.00210598	1	0.0290188	-6.3111	2.77e-10	------	1.08e-08	6.52e-06	0.82	-0.6591	-0.5333
2517	FUCA1	0.797242	-3.07579	-??-?-?	0.00209947	1	0.0290188
9469	CHST3	1.11298	3.0752	++?+++-	0.00210359	1	0.0290188	5.67562	1.38e-08	++++++	2.5e-07	0.000325148	1.25	0.7024	0.5261
23243	ANKRD28	1.31979	3.07493	+-+-++?	0.00210555	1	0.0290188
91283	MSANTD3	0.603868	-3.07609	-?-????	0.00209735	1	0.0290188	-5.18855	2.12e-07	-----?	2.31e-06	0.00498687	0.88
644	BLVRA	0.857898	-3.07344	-+?---?	0.00211609	1	0.0290422
4650	MYO9B	1.1151	3.07349	+-?++++	0.00211569	1	0.0290422	4.85361	1.21e-06	-+++++	9.98e-06	0.028526	1.13		0.4631
85019	TMEM241	1.8075	3.07396	+?+????	0.00211241	1	0.0290422
324	APC	0.704086	-3.07298	-+-----	0.00211933	1	0.0290483
1759	DNM1	0.540892	-3.0698	--?-?-+	0.00214199	1	0.02932
84060	RBM48	1.35758	3.06716	+???++?	0.00216103	1	0.0295417	4.76613	1.88e-06	++?+++	1.44e-05	0.0441879	1.12
23451	SF3B1	1.09169	3.06646	++-+++-	0.0021661	1	0.029572
5579	PRKCB	0.666581	-3.06603	----+-+	0.00216925	1	0.0295759
9667	SAFB2	1.16573	3.06396	++--++?	0.00218427	1	0.0297262	6.2712	3.58e-10	++?+++	1.32e-08	8.43e-06	1.24	0.6777	0.526
51031	GLOD4	0.731821	-3.06327	------?	0.00218936	1	0.0297262	-6.54554	5.93e-11	------	3.12e-09	1.39e-06	0.8	-0.6425	-0.5457
79016	DDA1	0.700423	-3.06294	--?-???	0.00219174	1	0.0297262	-5.87524	4.22e-09	--?---	9.47e-08	9.94e-05	0.86	-0.7237	-0.6256
79137	RETREG2	0.781202	-3.06344	+-----?	0.00218811	1	0.0297262
8815	BANF1	1.17844	3.06154	++?-+?+	0.00220199	1	0.0298261
5906	RAP1A	1.22301	3.06083	++?+++-	0.00220721	1	0.0298578	5.32274	1.02e-07	++?++-	1.27e-06	0.00240517	1.18	0.683	0.5569
2130	EWSR1	1.21248	3.05885	++?++-+	0.00222187	1	0.030017
6877	TAF5	1.23171	3.05776	+????+?	0.00222998	1	0.0300874
51547	SIRT7	1.1163	3.0565	++?++++	0.00223939	1	0.030175
201895	SMIM14	0.535934	-3.05333	-?-????	0.00226316	1	0.0304557
220972	2008-03-01	1.2858	3.0527	++?+++?	0.00226795	1	0.0304805
4733	DRG1	0.880107	-3.04936	-+?----	0.00229331	1	0.0307814	-4.78856	1.68e-06	--?---	1.31e-05	0.0395256	0.89		-0.5286
10313	RTN3	0.64774	-3.04622	-------	0.00231735	1	0.0310354	-4.99646	5.84e-07	------	5.37e-06	0.01374	0.84	-0.6033	-0.5274
342035	GLDN	0.364184	-3.04611	-?-????	0.00231822	1	0.0310354	-4.88799	1.02e-06	--?---	8.61e-06	0.0239699	0.76
8731	RNMT	0.77548	-3.04491	-------	0.0023275	1	0.0310393	-6.3962	1.59e-10	------	6.92e-09	3.75e-06	0.81	-0.6208	-0.5482
9673	SLC25A44	0.764312	-3.04502	-+----?	0.00232661	1	0.0310393
23285	KIAA1107	0.644626	-3.04505	--??--?	0.00232641	1	0.0310393
10055	SAE1	0.820678	-3.04415	--?---?	0.00233342	1	0.0310783	-4.75397	1.99e-06	-----+	1.52e-05	0.0469329	0.93	-0.6792	-0.5258
51380	CSAD	1.29211	3.04374	+???+++	0.00233661	1	0.0310808
7042	TGFB2	1.34465	3.04236	+?+??+?	0.00234733	1	0.0311036	4.84326	1.28e-06	++?+++	1.04e-05	0.0300539	1.31	0.6638	0.5415
8797	TNFRSF10A	1.8936	3.04256	+?+????	0.00234577	1	0.0311036	7.04297	1.88e-12	++?+++	2.07e-10	4.43e-08	1.16		0.4591
10190	TXNDC9	0.742346	-3.04303	-+-----	0.00234211	1	0.0311036	-5.74943	8.95e-09	--?---	1.76e-07	0.000210695	0.75	-0.6266	-0.4852
28984	RGCC	1.20526	3.04153	++-+++?	0.00235382	1	0.0311497
54769	DIRAS2	0.572962	-3.03967	--?---?	0.00236839	1	0.0313027	-5.31786	1.05e-07	--?---	1.3e-06	0.00247053	0.79	-0.6764	-0.5352
9550	ATP6V1G1	0.806119	-3.03786	-+?----	0.00238265	1	0.031451
11067	C10orf10	1.72112	3.03506	+??++??	0.00240488	1	0.0317041
5805	PTS	0.813067	-3.03172	-+?----	0.00243168	1	0.0320166	-5.61874	1.92e-08	------	3.28e-07	0.000452607	0.82	-0.6055	-0.4839
9806	SPOCK2	0.776872	-3.02917	------?	0.00245228	1	0.0322045
79034	C7orf26	1.09083	3.0288	+??-++?	0.00245527	1	0.0322045
150967	LINC01963	0.786563	-3.02924	-??-?-?	0.0024517	1	0.0322045
1936	EEF1D	1.20396	3.02701	++-++++	0.0024699	1	0.0323108	5.54994	2.86e-08	++?+++	4.52e-07	0.000672409	1.24	0.6645	0.5617
4929	NR4A2	0.655323	-3.02666	-+??---	0.00247273	1	0.0323108
23081	KDM4C	1.1487	3.02728	+??-?+?	0.00246764	1	0.0323108
535	ATP6V0A1	0.851637	-3.02506	--?-+-+	0.00248583	1	0.0323654
57102	C12orf4	0.874474	-3.02501	--?-+--	0.00248628	1	0.0323654
81873	ARPC5L	0.740664	-3.02563	----??-	0.00248115	1	0.0323654	-6.20971	5.31e-10	------	1.82e-08	1.25e-05	0.84	-0.7045	-0.5803
498	ATP5A1	0.679696	-3.02348	-+-----	0.00249886	1	0.0323761
7593	MZF1	1.13677	3.02339	++?++++	0.0024996	1	0.0323761
10087	COL4A3BP	0.451311	-3.02367	-?-????	0.00249728	1	0.0323761
51377	UCHL5	0.801165	-3.02385	--?-?-?	0.00249584	1	0.0323761	-6.01946	1.75e-09	--?---	4.75e-08	4.12e-05	0.77	-0.66	-0.521
587	BCAT2	1.25059	3.02063	+??+???	0.00252253	1	0.0325958	6.14659	7.92e-10	++?+++	2.52e-08	1.86e-05	1.17	0.6554	0.5342
8506	CNTNAP1	0.773797	-3.02052	--?-+--	0.00252343	1	0.0325958
23135	KDM6B	1.17947	3.02021	+-+?++?	0.002526	1	0.0325958
5701	PSMC2	0.739228	-3.01792	-+-----	0.00254518	1	0.0328025
1213	CLTC	0.69208	-3.01666	-----+-	0.0025558	1	0.032872
7170	TPM3	0.552623	-3.01652	-?-????	0.00255692	1	0.032872
23162	MAPK8IP3	0.786477	-3.01531	--?-???	0.00256715	1	0.0329626
5252	PHF1	1.10129	3.01464	+++-+++	0.00257284	1	0.0329877
9921	RNF10	0.75945	-3.01369	----+-?	0.00258092	1	0.0329877
22891	ZNF365	0.690529	-3.01328	--?---?	0.00258444	1	0.0329877
51315	KRCC1	1.2532	3.01321	++?-++?	0.00258502	1	0.0329877
54971	BANP	1.25785	3.01415	+???++?	0.00257697	1	0.0329877	4.88454	1.04e-06	++?+++	8.74e-06	0.0243932	1.12		-0.4744
2180	ACSL1	1.30274	3.0118	++?+++-	0.00259704	1	0.0331002
5594	MAPK1	0.803929	-3.00596	--?----	0.00264747	1	0.0337016
7412	VCAM1	0.754078	-3.00547	-??+---	0.00265173	1	0.0337144
706	TSPO	1.20031	3.00161	++?+++-	0.00268555	1	0.033785	6.50016	8.02e-11	++?+++	4.03e-09	1.89e-06	1.18	0.6746	0.5419
816	CAMK2B	0.706845	-2.99965	--?---+	0.00270293	1	0.033785
5042	PABPC3	1.18811	3.00029	++-+-++	0.00269724	1	0.033785
5495	PPM1B	1.03074	2.9998	++-+++-	0.00270155	1	0.033785
6886	TAL1	1.20239	3.00338	++?-+++	0.00266998	1	0.033785	5.81289	6.14e-09	++?++-	1.29e-07	0.000144482	1.24		0.5222
9472	AKAP6	0.833937	-3.00362	--?---+	0.00266787	1	0.033785	-6.58087	4.68e-11	------	2.58e-09	1.1e-06	0.79	-0.6392	-0.5514
9922	IQSEC1	0.746443	-3.00307	--?---?	0.00267271	1	0.033785
25759	SHC2	1.16793	3.00165	+???++?	0.00268518	1	0.033785
26099	SZRD1	1.10046	3.00238	++?+++?	0.00267878	1	0.033785
55290	BRF2	0.849226	-3.0002	------?	0.00269802	1	0.033785	-5.63874	1.71e-08	------	2.99e-07	0.000403057	0.86	-0.5991	-0.4739
55353	LAPTM4B	0.695446	-3.00182	-+-----	0.00268369	1	0.033785	-5.81697	5.99e-09	--?---	1.26e-07	0.000141004	0.8
79710	MORC4	1.24206	3.00047	+????+?	0.00269565	1	0.033785	5.55467	2.78e-08	-+++++	4.43e-07	0.00065447	1.14		0.4844
140735	DYNLL2	0.64354	-2.99976	-?-????	0.00270193	1	0.033785
222553	SLC35F1	0.515817	-2.99965	-?-????	0.0027029	1	0.033785
9399	STOML1	0.861641	-2.99846	--?-+--	0.00271348	1	0.0338352	-6.11804	9.47e-10	------	2.9e-08	2.23e-05	0.85	-0.6265	-0.5634
57019	CIAPIN1	0.778749	-2.99872	-+?---?	0.00271116	1	0.0338352
9653	HS2ST1	0.794388	-2.99586	--??---	0.0027367	1	0.0340822
474170	LRRC37A2	1.15349	2.99551	++++?+?	0.00273986	1	0.0340822	5.38586	7.21e-08	++?++?	9.58e-07	0.00169649	1.24
5955	RCN2	0.712896	-2.99382	-+-----	0.00275512	1	0.0342309	-6.09586	1.09e-09	------	3.26e-08	2.56e-05	0.85	-0.6097	-0.467
7227	TRPS1	1.25463	2.99196	+++++-+	0.00277194	1	0.0343986
80778	ZNF34	1.13876	2.99155	++?++??	0.00277569	1	0.0344039
6903	TBCC	0.821857	-2.99023	-??-?-?	0.00278765	1	0.0344889	-4.89581	9.79e-07	--?---	8.33e-06	0.0230362	0.84	-0.6247	-0.5065
23479	ISCU	0.666797	-2.99006	-+----?	0.0027892	1	0.0344889
6747	SSR3	0.66334	-2.98895	-?--???	0.00279935	1	0.0345365
10762	NUP50	0.696984	-2.98891	-+----?	0.00279971	1	0.0345365
57520	HECW2	0.578137	-2.98754	-?-????	0.00281232	1	0.0346507	-6.20663	5.41e-10	--?--+	1.84e-08	1.27e-05	0.8	-0.6297	-0.5022
5708	PSMD2	0.785002	-2.98644	-+-----	0.00282251	1	0.0346937
23411	SIRT1	1.19292	2.98658	++??++-	0.00282118	1	0.0346937	4.99602	5.85e-07	+++++-	5.38e-06	0.0137708	1.15		0.5363
541578	CXorf40B	0.842605	-2.98475	-+?---?	0.00283811	1	0.0348442
2210	FCGR1B	1.77343	2.98155	+???+??	0.00286798	1	0.0349623
3035	HARS	0.794826	-2.98287	-+?----	0.00285564	1	0.0349623
5718	PSMD12	0.762324	-2.98194	-+?----	0.0028643	1	0.0349623	-5.19029	2.1e-07	-+?---	2.29e-06	0.00494057	0.79		-0.493
8803	SUCLA2	0.624868	-2.98157	-+-----	0.00286778	1	0.0349623
23518	R3HDM1	0.740192	-2.98174	------?	0.00286611	1	0.0349623	-4.85614	1.2e-06	+----+	9.88e-06	0.0281641	0.93	-0.645	-0.5413
53616	ADAM22	0.655949	-2.98314	------?	0.00285307	1	0.0349623
9110	MTMR4	0.727116	-2.97964	-+-----	0.00288587	1	0.0350567	-4.74998	2.03e-06	-+----	1.55e-05	0.0478677	0.86
9114	ATP6V0D1	0.845129	-2.97997	--+---?	0.00288278	1	0.0350567
22982	DIP2C	1.15512	2.98035	+-?+++?	0.00287918	1	0.0350567
23241	PACS2	1.09587	2.97833	++--++?	0.00289828	1	0.0351251
23328	SASH1	1.08068	2.97868	++-?+-?	0.00289491	1	0.0351251	5.97534	2.3e-09	++?+++	5.96e-08	5.4e-05	1.46	0.6706	0.5709
80212	CCDC92	0.796952	-2.97556	--?-+-?	0.00292456	1	0.0354022
6678	SPARC	1.39435	2.97463	++-++++	0.00293347	1	0.0354686	4.8199	1.44e-06	++?+++	1.15e-05	0.0337964	1.24	0.598	0.5465
6907	TBL1X	1.32214	2.97376	+????++	0.00294171	1	0.0355268	6.46925	9.85e-11	++++++	4.69e-09	2.32e-06	1.4	0.6582	0.5365
2990	GUSB	1.23041	2.97062	+++-+++	0.00297195	1	0.0358276
100289333	LOC100289333	1.78391	2.97046	+?+????	0.00297353	1	0.0358276
1607	DGKB	0.637712	-2.9694	-?-??-?	0.00298379	1	0.0358417
2926	GRSF1	0.735392	-2.96927	-+-----	0.00298508	1	0.0358417
55227	LRRC1	1.35278	2.96928	+????+?	0.00298501	1	0.0358417
22931	RAB18	0.497267	-2.96755	-?-????	0.00300183	1	0.0360012
64983	MRPL32	0.42948	-2.96597	-?-????	0.00301726	1	0.0361443
8622	PDE8B	0.768932	-2.96544	--??--?	0.00302252	1	0.0361656
9652	TTC37	0.773445	-2.9636	-+----?	0.00304064	1	0.0363404
2874	GPS2	1.11362	2.96295	++?-+++	0.00304703	1	0.0363747	5.07199	3.94e-07	++?+++	3.86e-06	0.00926341	1.15
5900	RALGDS	1.20644	2.96071	++?+++?	0.00306927	1	0.0365981
3094	HINT1	0.70873	-2.95741	-+-----	0.00310233	1	0.0369157
79134	TMEM185B	0.729891	-2.95734	-????-?	0.00310303	1	0.0369157
5510	PPP1R7	0.839794	-2.95605	------+	0.00311608	1	0.0370285	-7.04786	1.82e-12	------	2.03e-10	4.27e-08	0.83	-0.7259	-0.5813
4495	MT1G	1.52797	2.95445	++++-+?	0.00313232	1	0.0371179	5.50468	3.7e-08	++++++	5.57e-07	0.000870242	1.46		0.457
54934	KANSL2	1.13879	2.95463	++?+?+?	0.00313044	1	0.0371179
57162	PELI1	1.19209	2.95424	++?-++-	0.00313435	1	0.0371179	5.16488	2.41e-07	++++++	2.55e-06	0.00566126	1.21	0.6157	0.484
3313	HSPA9	0.690231	-2.95048	-+-----	0.00317277	1	0.0373641
7533	YWHAH	0.62616	-2.95138	--?-+--	0.00316362	1	0.0373641
9604	RNF14	0.802127	-2.95044	-+?----	0.00317317	1	0.0373641
29127	RACGAP1	1.10839	2.9518	++-?++-	0.00315932	1	0.0373641
259230	SGMS1	1.2706	2.95095	++?+++?	0.00316797	1	0.0373641
3631	INPP4A	0.737493	-2.95001	-?--?-?	0.00317767	1	0.0373746	-5.35686	8.47e-08	--?---	1.09e-06	0.00199253	0.75	-0.6085	-0.501
8382	NME5	0.802807	-2.94888	-????-+	0.00318931	1	0.037469	-5.51301	3.53e-08	------	5.36e-07	0.000830032	0.81	-0.6432	-0.5087
9878	TOX4	0.91831	-2.9482	-+?---?	0.00319634	1	0.0375091	-5.83911	5.25e-09	--?---	1.14e-07	0.000123483	0.87
1185	CLCN6	0.807092	-2.94422	-??-?-?	0.00323767	1	0.0379511
26052	DNM3	0.631513	-2.94353	------?	0.00324489	1	0.0379927
55651	NHP2	0.888137	-2.94214	-+?---?	0.00325952	1	0.0381209	-5.3456	9.01e-08	--?---	1.15e-06	0.00212043	0.84	-0.6702	-0.5271
25871	NEPRO	0.518283	-2.94178	-?-????	0.00326334	1	0.0381226
57326	PBXIP1	1.31125	2.94047	+++++++	0.00327715	1	0.0382408	4.90538	9.32e-07	++++++	7.99e-06	0.0219411	1.4
376267	RAB15	0.682356	-2.93987	--?-???	0.00328349	1	0.0382717
26119	LDLRAP1	1.14638	2.93942	++?-++?	0.00328831	1	0.0382847
9648	GCC2	0.78429	-2.93864	--?---?	0.00329651	1	0.0383372
378	ARF4	0.694442	-2.93589	-+-----	0.00332588	1	0.0385611
55268	ECHDC2	1.19157	2.9358	++?+++?	0.00332693	1	0.0385611
56893	UBQLN4	1.51284	2.93634	+?+??+?	0.00332108	1	0.0385611
3491	CYR61	0.723791	-2.93351	+-----?	0.00335155	1	0.038672
4139	MARK1	0.842436	-2.93378	-??---?	0.00334864	1	0.038672	-5.44314	5.24e-08	--?---	7.42e-07	0.00123181	0.78	-0.6572	-0.5069
5033	P4HA1	1.3277	2.93283	+++++--	0.00335888	1	0.038672	5.30272	1.14e-07	++?++-	1.38e-06	0.00268455	1.13		0.4654
9900	SV2A	0.491232	-2.93284	--?-???	0.00335879	1	0.038672
55303	GIMAP4	1.39034	2.93441	++?????	0.0033418	1	0.038672	7.13213	9.88e-13	++++++	1.26e-10	2.33e-08	1.23	0.6531	0.5751
55636	CHD7	1.19756	2.93388	+???++?	0.00334755	1	0.038672
84707	BEX2	0.409785	-2.93182	-?-????	0.00336981	1	0.0387547	-4.93695	7.94e-07	--?--+	6.91e-06	0.0186722	0.79	-0.6748	-0.5743
25843	MOB4	0.827756	-2.93061	--?---?	0.00338298	1	0.038863	-4.85236	1.22e-06	--?--?	1e-05	0.0287072	0.79
23035	PHLPP2	0.799072	-2.93018	-????-?	0.00338761	1	0.0388732
4738	NEDD8	0.839359	-2.92837	-+?-?--	0.00340741	1	0.0390139
79072	FASTKD3	0.815726	-2.92838	-??-?-?	0.00340738	1	0.0390139
79768	KATNBL1	1.14731	2.92665	++?-?+?	0.0034263	1	0.0391869
7840	ALMS1	1.34032	2.92609	+++?++?	0.00343252	1	0.0392148
3356	HTR2A	0.761244	-2.92504	--+?--+	0.00344407	1	0.0392601	-6.22001	4.97e-10	--?---	1.71e-08	1.17e-05	0.72	-0.6179	-0.5071
64219	PJA1	0.846472	-2.9252	--?----	0.0034423	1	0.0392601
57134	MAN1C1	0.794661	-2.92361	--?----	0.00345995	1	0.0393978
4915	NTRK2	0.903187	-2.92283	---+--+	0.00346863	1	0.0394533
65059	RAPH1	0.556932	-2.92203	-?-????	0.0034776	1	0.0394687
155066	ATP6V0E2	0.806027	-2.92207	-+----+	0.00347716	1	0.0394687
972	CD74	1.402	2.91999	+++++++	0.00350043	1	0.0396409	7.48968	6.91e-14	++?+++	1.73e-11	1.62e-09	1.39
145581	LRFN5	0.520696	-2.92029	-?-????	0.00349711	1	0.0396409
89845	ABCC10	1.23527	2.91923	++??++?	0.00350899	1	0.0396945	4.86667	1.13e-06	++++++	9.42e-06	0.0267054	1.19
10920	COPS8	0.827358	-2.91767	-+?----	0.00352662	1	0.0398505	-6.86054	6.86e-12	------	5.62e-10	1.61e-07	0.82	-0.6537	-0.5284
2947	GSTM3	0.792816	-2.9168	+-?----	0.0035364	1	0.0398811
23760	PITPNB	0.735946	-2.91675	-------	0.00353703	1	0.0398811	-4.88104	1.06e-06	--?---	8.86e-06	0.0248303	0.81	-0.6136
2052	EPHX1	1.34425	2.91545	++?+??+	0.00355177	1	0.0400037	5.36541	8.08e-08	-+++++	1.05e-06	0.00190045	1.18	0.626	0.5049
7247	TSN	0.788317	-2.91262	-+-----	0.00358415	1	0.0402372	-5.06539	4.08e-07	--?---	3.98e-06	0.00959017	0.89
10970	CKAP4	0.848924	-2.9131	-------	0.00357855	1	0.0402372
51588	PIAS4	1.16665	2.91271	++?-+-?	0.00358312	1	0.0402372	5.89477	3.75e-09	++++++	8.62e-08	8.83e-05	1.27
1977	EIF4E	0.762285	-2.91188	-+-----	0.00359257	1	0.0402525	-5.21243	1.86e-07	-+?---	2.07e-06	0.00438557	0.8	-0.6384	-0.4657
10565	ARFGEF1	0.749247	-2.91182	----?+?	0.00359327	1	0.0402525
576	ADGRB2	0.675086	-2.91078	--?-???	0.00360532	1	0.0403438
6472	SHMT2	1.1837	2.90953	+?+??+?	0.00361968	1	0.0404608
64781	CERK	0.744867	-2.90915	-+?---?	0.00362415	1	0.0404671
1604	CD55	0.645772	-2.9055	-?--?-?	0.00366669	1	0.040898	4.87147	1.11e-06	-+++++	9.22e-06	0.0260648	1.1
7704	ZBTB16	1.23649	2.90505	++??+--	0.00367191	1	0.0409122	5.59479	2.21e-08	++?+++	3.66e-07	0.000519767	1.2	0.6575	0.4951
586	BCAT1	0.643465	-2.90329	-????-?	0.00369267	1	0.0410148
4942	OAT	0.739791	-2.90334	-+-----	0.00369202	1	0.0410148	-6.19671	5.77e-10	------	1.94e-08	1.36e-05	0.82	-0.6269	-0.491
55966	AJAP1	0.813879	-2.90326	--??--?	0.003693	1	0.0410148
84302	TMEM246	0.710862	-2.902	--?-+-?	0.00370794	1	0.0411367
5297	PI4KA	0.646815	-2.90104	--?---?	0.0037193	1	0.0411997
29796	UQCR10	0.789446	-2.90085	-+-----	0.00372157	1	0.0411997
84833	USMG5	0.466565	-2.90046	-?-????	0.00372613	1	0.0412061
10274	STAG1	1.19169	2.89961	+????++	0.00373626	1	0.0412347
124044	SPATA2L	0.802557	-2.89958	--?????	0.00373667	1	0.0412347
11137	PWP1	0.853662	-2.89881	-+?----	0.00374583	1	0.0412918
10775	POP4	0.84649	-2.89664	-+?----	0.00377178	1	0.0415337	-5.85135	4.88e-09	-+----	1.07e-07	0.000114729	0.82	-0.6628	-0.5417
7358	UGDH	1.15437	2.89025	++??+++	0.00384935	1	0.0422979
55827	DCAF6	0.782752	-2.89052	--?+--?	0.003846	1	0.0422979	-4.97185	6.63e-07	--?---	5.96e-06	0.0156042	0.82	-0.656	-0.5288
6428	SRSF3	0.696483	-2.88981	-+-----	0.00385475	1	0.0423124
128	ADH5	0.774996	-2.88938	-+-----	0.00385998	1	0.042325
8195	MKKS	0.801106	-2.889	--?----	0.00386472	1	0.0423321	-4.83027	1.36e-06	------	1.11e-05	0.0320832	0.74
23354	HAUS5	1.09904	2.88711	++?+++?	0.00388804	1	0.0425426
4952	OCRL	0.80925	-2.88555	-+?----	0.00390729	1	0.0426183
6801	STRN	0.540472	-2.88569	-?-????	0.00390555	1	0.0426183
140465	MYL6B	0.829529	-2.88618	-+----+	0.00389943	1	0.0426183
55361	PI4K2A	0.830253	-2.88384	--?---?	0.00392862	1	0.0428059
56990	CDC42SE2	0.424818	-2.88255	-?-????	0.00394464	1	0.0429353	-5.73387	9.82e-09	-+?---	1.9e-07	0.000230986	0.84	-0.6362	-0.4796
28969	BZW2	0.805312	-2.88213	---?--?	0.00395	1	0.0429484	-6.29805	3.01e-10	------	1.15e-08	7.09e-06	0.86	-0.6799	-0.5941
55196	KIAA1551	1.16505	2.87944	++-+?+?	0.00398377	1	0.0432702	5.63997	1.7e-08	++?+++	2.98e-07	0.000400208	1.3
4692	NDN	0.798182	-2.87836	-+-----	0.00399743	1	0.0433732	-6.65951	2.75e-11	------	1.68e-09	6.46e-07	0.78	-0.6707	-0.508
6581	SLC22A3	2.02472	2.8776	+?+????	0.00400716	1	0.0433857
23033	DOPEY1	0.804778	-2.87695	-???--?	0.00401533	1	0.0433857	-6.13459	8.54e-10	------	2.69e-08	2.01e-05	0.8		-0.5303
54477	PLEKHA5	0.797745	-2.87701	------?	0.00401461	1	0.0433857
54861	SNRK	0.680525	-2.87783	------?	0.00400427	1	0.0433857
460	ASTN1	0.780463	-2.8751	--?---?	0.00403903	1	0.0435509	-5.29209	1.21e-07	--?--+	1.45e-06	0.0028454	0.88	-0.6282	-0.5703
23254	KAZN	1.07998	2.87525	++?-+-?	0.0040371	1	0.0435509
8030	CCDC6	0.714507	-2.87372	-?-??--	0.00405673	1	0.0436962
475	ATOX1	0.75318	-2.87283	-?--?--	0.00406817	1	0.0437286
4708	NDUFB2	0.746937	-2.87303	-+-----	0.00406551	1	0.0437286
158158	RASEF	2.16011	2.87167	+?+????	0.00408313	1	0.043844	5.20423	1.95e-07	++?+++	2.14e-06	0.00458375	1.26
4712	NDUFB6	0.838718	-2.86947	-+?----	0.00411157	1	0.0441036	-5.20346	1.96e-07	-+?---	2.15e-06	0.00460284	0.84	-0.6289	-0.4997
9873	FCHSD2	1.31179	2.86861	++???+?	0.00412277	1	0.044178
55131	RBM28	1.11098	2.86794	++?+++?	0.00413159	1	0.0442268
10675	CSPG5	0.817738	-2.86643	---+--+	0.00415128	1	0.0443917	-5.84385	5.1e-09	+-?---	1.11e-07	0.000120024	0.93		-0.4619
57692	MAGEE1	0.425706	-2.86595	-?-????	0.00415755	1	0.0444129
54976	C20orf27	0.769356	-2.86425	-??-???	0.00417993	1	0.044606
9221	NOLC1	0.762622	-2.86385	-+-+---	0.0041852	1	0.0446163
5300	PIN1	0.739832	-2.86258	-??-??+	0.00420212	1	0.0447047	-5.18193	2.2e-07	--?---	2.38e-06	0.00516729	0.88	-0.7284	-0.5955
25959	KANK2	1.19889	2.86268	++?-++?	0.00420075	1	0.0447047	6.71268	1.91e-11	++?+++	1.27e-09	4.5e-07	1.47	0.6538	0.5409
83478	ARHGAP24	0.74013	-2.86187	-????-?	0.00421145	1	0.044758
4242	MFNG	1.15746	2.86133	++?++++	0.00421868	1	0.0447889	4.93539	8e-07	++?++-	6.96e-06	0.0188216	1.11	0.6184	0.5151
2531	KDSR	1.02021	2.86033	++--+++	0.00423207	1	0.0448851
51029	DESI2	1.16222	2.85968	++?+++?	0.00424069	1	0.0449305
408	ARRB1	0.836837	-2.85826	--?---?	0.00425971	1	0.0450859
55207	ARL8B	0.722099	-2.85747	------?	0.00427039	1	0.0451528
2908	NR3C1	1.05147	2.85541	++--+++	0.0042981	1	0.0453533
79912	PYROXD1	0.71172	-2.85564	-+-----	0.00429505	1	0.0453533
274	BIN1	1.14788	2.8548	++?-+-+	0.00430636	1	0.0453942
53827	FXYD5	1.19524	2.85419	++?++++	0.00431464	1	0.0454353	6.15441	7.54e-10	?+?+++	2.43e-08	1.77e-05	1.25	0.6598	0.5552
26205	GMEB2	1.07155	2.85349	++?++++	0.00432425	1	0.0454537
203068	TUBB	0.760285	-2.85342	--?-+--	0.00432517	1	0.0454537
2941	GSTA4	0.833819	-2.85285	--?----	0.00433289	1	0.0454887	-7.26527	3.72e-13	------	6.13e-11	8.76e-09	0.78	-0.6856	-0.5606
261726	TIPRL	0.788138	-2.85229	-?-?-??	0.00434054	1	0.0455229
9344	TAOK2	1.26252	2.85019	?????++	0.00436926	1	0.0456953
54386	TERF2IP	0.765881	-2.8499	-+-----	0.00437326	1	0.0456953	-5.10284	3.35e-07	--?---	3.37e-06	0.00787297	0.82	-0.6299	-0.511
84939	MUM1	1.13117	2.85018	++-?+-?	0.00436944	1	0.0456953
85453	TSPYL5	0.664897	-2.8498	-+--+-?	0.00437462	1	0.0456953	-5.92969	3.04e-09	--?---	7.39e-08	7.14e-05	0.76	-0.6601	-0.5173
11325	DDX42	0.792228	-2.84858	-+----+	0.00439143	1	0.0457956	-5.5005	3.79e-08	--?--+	5.67e-07	0.000891123	0.87		-0.4813
51693	TRAPPC2L	0.833361	-2.84847	-+?-?--	0.00439305	1	0.0457956	-6.2582	3.89e-10	--?---	1.41e-08	9.16e-06	0.75	-0.7017	-0.5879
5522	PPP2R2C	0.571289	-2.84769	-?-????	0.00440372	1	0.0458146	-6.00139	1.96e-09	--?---	5.2e-08	4.6e-05	0.84	-0.6343	-0.5072
26045	LRRTM2	0.670592	-2.84797	---?--?	0.00439986	1	0.0458146
54832	VPS13C	1.16533	2.84532	++--++?	0.00443674	1	0.0461119	5.67214	1.41e-08	++?+++	2.54e-07	0.000331832	1.23	0.6868	0.6027
9732	DOCK4	1.18697	2.84487	++?+++?	0.00444295	1	0.0461301
10740	RFPL1S	0.649383	-2.84355	-????-?	0.00446134	1	0.0462747
51026	GOLT1B	0.805308	-2.84293	-??---?	0.00447009	1	0.046319	-5.64777	1.63e-08	--?---	2.86e-07	0.000382459	0.76
1073	CFL2	0.395563	-2.84183	-?-????	0.00448553	1	0.0464326
7381	UQCRB	0.756987	-2.84027	-+-----	0.00450756	1	0.0466141
55486	PARL	0.858337	-2.8399	-+??--?	0.00451279	1	0.0466217	-5.91998	3.22e-09	--?--+	7.72e-08	7.58e-05	0.88	-0.6204	-0.5037
1620	BRINP1	0.849713	-2.83923	+-+---+	0.00452226	1	0.046673
23076	RRP1B	1.15258	2.83856	++?-++?	0.00453176	1	0.0467245
26017	FAM32A	0.878593	-2.83744	-+?---?	0.00454762	1	0.0468414
29118	DDX25	0.778146	-2.83634	--???--	0.0045634	1	0.0469572	-6.6201	3.59e-11	------	2.1e-09	8.45e-07	0.8	-0.65	-0.5822
23608	MKRN1	0.712157	-2.83504	-+-----	0.00458206	1	0.0471025
23708	GSPT2	0.800602	-2.83468	-+?---?	0.00458718	1	0.0471084
818	CAMK2G	0.759892	-2.83424	--?---?	0.00459348	1	0.0471264
293	SLC25A6	0.830042	-2.83338	--?---?	0.00460579	1	0.047206
9130	FAM50A	1.10795	2.83242	++?-+-+	0.00461966	1	0.0472546
79612	NAA16	1.14644	2.83242	++?-++?	0.00461966	1	0.0472546
2135	EXTL2	0.760417	-2.83166	--?---?	0.00463066	1	0.0472655
6169	RPL38	1.15226	2.83148	++--+++	0.00463329	1	0.0472655
26521	TIMM8B	0.799786	-2.83134	-+-----	0.00463536	1	0.0472655	-6.2423	4.31e-10	------	1.53e-08	1.01e-05	0.85	-0.6487	-0.4542
29072	SETD2	1.13463	2.83109	++?-++?	0.00463898	1	0.0472655
3376	IARS	0.680427	-2.82858	-+-----	0.00467547	1	0.0475906	-4.87559	1.08e-06	--?---	9.06e-06	0.025526	0.8	-0.6185	-0.4788
2824	GPM6B	1.12185	2.82756	++-+++?	0.00469037	1	0.0476487
26986	PABPC1	1.18584	2.82758	++-+-++	0.00469017	1	0.0476487
56993	TOMM22	0.584999	-2.8257	-?-????	0.0047177	1	0.0478793	-4.96354	6.92e-07	--?---	6.18e-06	0.016287	0.85	-0.6644	-0.4906
6253	RTN2	0.85249	-2.82388	--?---+	0.00474462	1	0.0480115
9140	ATG12	0.766584	-2.82398	-+-----	0.00474316	1	0.0480115
84284	NTPCR	0.479472	-2.82395	-?-????	0.00474363	1	0.0480115	-6.50885	7.57e-11	------	3.83e-09	1.78e-06	0.83
57132	CHMP1B	0.831159	-2.82265	--?????	0.00476293	1	0.0481497
9352	TXNL1	0.780693	-2.81993	-+-----	0.00480339	1	0.0484004
9477	MED20	1.08113	2.81995	++?-++?	0.00480308	1	0.0484004
51118	UTP11	0.840182	-2.82019	-??-?-?	0.00479958	1	0.0484004	-6.08547	1.16e-09	--?---	3.46e-08	2.73e-05	0.87	-0.6067	-0.5251
124411	ZNF720	0.644585	-2.81962	-?-????	0.00480805	1	0.0484004
441151	TMEM151B	0.773434	-2.81942	--?---?	0.00481108	1	0.0484004
80013	MINDY3	0.81593	-2.8189	-???--?	0.0048188	1	0.048431	-6.13689	8.42e-10	--?---	2.65e-08	1.98e-05	0.83	-0.6106	-0.5316
9738	CCP110	1.09208	2.81664	++-+++?	0.00485287	1	0.0487262
10284	SAP18	0.82821	-2.81428	-+-----	0.00488864	1	0.0489965
23596	OPN3	0.737238	-2.81424	--?----	0.00488925	1	0.0489965	-5.83366	5.42e-09	--?---	1.17e-07	0.000127591	0.77	-0.6772	-0.5539
90864	SPSB3	1.12525	2.81289	++?++??	0.00490983	1	0.0491552
10623	POLR3C	0.810297	-2.81212	-????-?	0.00492162	1	0.0492089
79084	WDR77	0.924357	-2.81192	--?---?	0.00492469	1	0.0492089
79622	SNRNP25	0.795752	-2.81112	--?---?	0.00493689	1	0.0492358
81853	TMEM14B	0.808293	-2.81119	-+?---?	0.00493592	1	0.0492358	-6.35744	2.05e-10	------	8.45e-09	4.83e-06	0.84	-0.6755	-0.519
427	ASAH1	0.853583	-2.81014	-+----+	0.00495195	1	0.0493385
55508	SLC35E3	0.814202	-2.80853	-???---	0.00497678	1	0.0495384
5191	PEX7	0.775658	-2.80677	-????-?	0.00500404	1	0.0497619	-5.93982	2.85e-09	------	7.05e-08	6.71e-05	0.84
5156	PDGFRA	1.31763	2.80639	++?++++	0.00500998	1	0.0497732
4124	MAN2A1	1.23753	2.80586	++-+++-	0.00501827	1	0.0498078
51022	GLRX2	0.697941	-2.80494	-+----?	0.00503266	1	0.0499009
255520	ELMOD2	1.56368	2.80464	+?+????	0.00503729	1	0.0499009
